# Supplementary material for: Dual-Orbital Synergy in Paired Cu(II) Open Metal Sites for Enhanced High-Temperature Hydrogen Isotope Separation
Source: Research Square preprint supplement (doi:10.21203/rs.3.rs-7838780/v1), 2025-10-23
Supplement: Supplementary file 1 [file b8d5a46846d385f553b02ca8.docx]

Supporting information

Dual-Orbital Synergy in Paired Cu(II) Open Metal Sites for Enhanced High-Temperature Hydrogen Isotope Separation

Fenglei Wanga, Zining Wanga, Chaofan Jianga, Wenting Liu a, Yuchen Jianga, Yu Luoa,

Huimin Lia, Qingyang Wanga, Yuanhua Wanga, Song Qina，Yongdong Jina，Chuanqin Xiaa,*, Lijian Maa,*

**Experimental Section**

Section 1: Syntheses of MOFs

Materials

1, 3, 5, 7-adamantanetetracarboxylic acid (H4ATC), 3,3′,5,5′-biphenyltetracarboxylic acid (H4bptc), methanetetra(p-benzoic acid) (H4mbtc), Cu(NO3)2·2.5H2O were obtained from the Shanghai Haohong Scientific Co.,Ltd. (Shanghai, China). Sodium hydroxide (NaOH), methanol (CH3OH), ethanol (CH3CH2OH), N,N-dimethylformamide (DMF) and N,N-Diethylformamide (DEF) were purchased from Knowles Chengdu Chron Chemical Co., ltd. (Chengdu, China). All the water used was ultrapure water. All chemicals were analytical grade (AR) and used as received.

Synthesis of Cu2(ATC)(H2O)2·5H2O

The Cu2(ATC)(H2O)2·5H2O was synthesized according to the method from literature with slight modification. 1 A mixture of H4ATC (0.035 g, 0.11 mmol) and Cu(NO3)2·2.5H2O (0.077 g, 0.33 mmol) in 3 mL 1×10 M-3 aqueous NaOH, was heated to 100 ℃ to get the clear blue solution. The aqueous solution was then heated to 200 ℃ for 18 h to give green crystals of ATC-Cu along with tiny amounts of crystalline H4ATC. The solid was filtered and then washed with hot water several times and then get the pure Cu2(ATC)(H2O)2·5H2O crystal.

Preparation of anhydrous Cu-ATC

The crystals of Cu2(ATC)(H2O)2·5H2O were soaked in anhydrous methanol for 2 days with fresh methanol 5 times. Then, the crystals were vacuumed at room temperature till the pressure below to 3 μmHg, the temperature was increased to 120 ℃ and vacuum for 5 h. After the pressure decreasing to 3 umHg, the temperature was increased to 190 ℃ and vacuum for 12 h. Consequently, the dark purple crystal of anhydrous Cu-ATC was obtained.

Synthesis of Cu2(bptc)(H2O)2·3DMF·H2O

The Cu2(bptc)(H2O)2·3DMF·H2O was synthesized according to the method from literature with slight modification. 2 The solvothermal reaction of 3,3’,5,5’-biphenyltetracarboxylic acid (H4bptc; 0.025 g, 0.076 mmol) and Cu(NO3)2·2.5H2O (0.052 g, 0.22 mmol) in DMF/ethanol/H2O (3:3:2 v/v/v) at 65 ℃ for 24 h gave green, blockshaped crystals.

Preparation of anhydrous Cu-bptc

The crystals of Cu2(bptc)(H2O)2·3DMF·H2O were soaked in acetone for 3 days with fresh acetone 3 times to exchange the DMF guests. Then, the crystals were vacuumed at room temperature till the pressure below to 3 μmHg, the temperature was increased to 120 ℃ and vacuum for 12 h. Consequently, the dark blue crystals of anhydrous Cu-bptc were obtained.

Synthesis of Cu2(mbtc)(H2O)2·6DEF·2H2O

The Cu2(mbtc)(H2O)2·6DEF·2H2O was synthesized according to the method from literature with slight modification. 3 A mixture of H4mbtc (0.015 g, 0.030 mmol) and Cu(NO3)2·2.5H2O (0.03 g, 0.13 mmol) in DEF/H2O (4.5 mL/1.5 mL) mixed solvents was placed in a screw-capped vial. After addition of several drops of HCl (3 M, aq.), the vial was capped and placed in an oven at 80 ℃ for one day. Blue crystals of Cu2(mbtc)(H2O)2·6DEF·2H2O were collected by filtration

Preparation of anhydrous Cu-mbtc

The crystals of Cu2(mbtc)(H2O)2·6DEF·2H2O were washed with MeOH three times over a 12 h period, and then washed with CH2Cl2 three times. The resulting dark blue crystals were washed with cyclohexane several times and then soaked in cyclohexane overnight. About 1 mL of benzene was left in the sample cell, and the sample cell was then frozen at 0 ℃. After three freeze-thaw cycles, the sample cell was placed in an ice/H2O bath and evacuated under a dynamic vacuum for 24 h. The ice/H2O bath was removed and the sample was kept under vacuum at room temperature for another 24 h, and then heated under vacuum at 60 ℃ for 16 h. Consequently, the blue crystals of anhydrous Cu-mbtc were obtained.

Section 2: Instruments and characterizations

**Gas sorption measurements**

The N2 adsorption isotherms of the materials were performed on ASAP 2460 at 77 K (Micromeritics, USA). Nonlocalized density functional theory (NLDFT) was used to obtain the pore size distribution of the materials, and Brunauer-Emmett-Teller (BET) model was used to describe the BET surface areas of the materials. The H2, D2 adsorption isotherms of the materials at 77 K and 87 K were measured on automatic volumetric adsorption apparatus (Micromeritics ASAP 2020 + ).

***In situ* Diffuse Reflectance Infrared Fourier-transformed (DRIFT)**

DRIFT spectra were collected in Nicolet IS50 spectrometer. Samples were loaded into a sample cup within a Harrick praying Mantis reaction chamber (CHC), two K-type thermocouples were placed in the bottom of the cup to monitor sample temperatures. The inlet/outlet of the chamber was connected to a homemade gas evacuation and charging apparatus, MOF powders were loaded into the sample cup, and its bottom was filled with short copper wires to accelerate heat conduction. Activated MOF was obtained by in situ heating MOF powders up to 120 °C under vacuum with a ramp of 4 °C /min and then maintaining at 120 °C for ~1.5 h. Hydrogen gas was employed with the purity of ≥ 99.999%. During DRIFTs measurements, all spectra were collected using the spectrum of outgassed MOF sample as the background. At 298 K, to enhance the spectrum signal, hydrogen gas was stepwisely dosed with each dosage of ~2.6 mL.

**Cryogenic thermal desorption spectroscopy**

The Cryogenic thermal desorption spectroscopy (TDS) is a method of observing gases desorbed from the surface while elevating the surface temperature after exposing the sample to a target gas pressure at a preset temperature. The mass spectrometer installed at the outlet can analyze and detect the species and quantity of desorbed gas molecules in real time, and the separation factor can be obtained based on the ratio of desorbed isotope gases. The TDS of H2/D2 gas mixture on MOF was carried out using the experimental procedure recommended by the Max Planck Institute. First, about ∼ 5 mg samples were placed in the sample chamber and activated under vacuum at 110 ℃ for 12 h (final pressure < 10-4 Pa). Then the sample chamber was assembled into the ACTDS experimental apparatus for evacuation (final pressure < 10-3 Pa). At the same time, the sample chamber was cooled down and maintained for a period of time after the sample chamber was reduced to the experimental temperature. A H2/D2 mixture of 1.0 kPa was injected into the sample tube (nD2:nH2 = 1:1.1636) and maintained for 10 min, the H2/D2 mixture gas saturated competitive adsorption was completed. After the H2/D2 mixture was completely saturated and competitively adsorbed, the unattached H2/D2 mixture was quickly evacuated. The sample tube was cooled down to 20 K for a period of time (∼ min). At the same time, MS began to record the desorption H2/D2 signal (after absolute quantity calibration, the peak area of H2/D2 signal in MS response was proportional to the capacity of H2/D2), which corresponded to the desorption H2/D2 capacity, that is, the capacity of H2/D2 adsorbed by the material.

**Dynamic column breakthrough experiment**

The real-time low-temperature apparatus coupled with mass spectrometer (PFEIFFER VACUUM) was used for receiving the breakthrough curves. H2/D2/Ne (10/10/80, vol.%) gas mixture at a flow rate of 5 mL/min and 77 K and 100 kPa conditions were used. The flow rate of the gas mixture was controlled by a mass flowmeter at the entrance, and the composition of the gas at the exit was monitored by mass spectrometer.

**Isosteric Enthalpy of Adsorption**

The isosteric enthalpies of adsorption for hydrogen and deuterium were calculated using the isotherms at 77 K and 87 K, following the Viral equation:

Where P is the pressure (mmHg), N is the capacity adsorbed (mg g-1), T is the temperature (K), ai and bj represents Viral coefficients, and m, n is the number of coefficients required to detailed describe the isotherms. The values of the Viria coefficients a0 to am were then used to calculate the Isosteric enthalpy of adsorption according to the following equation:

Qst is the isosteric enthalpy of adsorption in kJ mol-1 and R is universal gas constant with the value of 8.314 J mol-1 K-1.

**Selectivity by IAST**

Ideal adsorption solution theory (IAST) was calculated to evaluate the hydrogen isotope capture performance. 4 Double-site Langmuir (DSL) equation was firstly employed to fit the single-component gas equilibrium adsorption isotherms of MOF over the full pressure range. DSL equation can be written as:

Where N is the adsorption capacity (mmol g-1), p is the pressure of bulk gas at equilibrium with adsorbed phase (bar), A1 and A2 are the saturation loadings for sites 1 and 2, respectively. b1 and b2 are the Langmuir parameters for sites 1 and 2. The parameters of A1, A2, b1 and b2 were then used to predict the adsorption selectivity based on IAST, which is finally defined as:

Where S represents the ideal selectivity of component 1 over component 2, xi x1 and yi are the adsorbed phase mole fractions and the gas phase mole fractions, respectively.

Adsorption Capacity Calculation Based on Breakthrough Experiments

On the basis of mass balance, the gas adsorption amounts based on breakthrough experiments can be defined as follows 5 :

Where qi is the equilibrium adsorption amount of component i (mmol g-1), ai is the percent of component i in the mixture, V is the flow rate of the mixed gas (mL min-1), m is the quality of activated sample packed in the sample column (g), t is the adsorption time for the component i (min), y0 and yi are the inlet and outlet gas molar flow rates, respectively. Vm = 22.4 L/mol. L mol-1. The separation factor (α) of the breakthrough test is defined as follows:

Where yi and yj represent the molar fractions of component i and j in the steel bottle, respectively.

**Computational method**

The crystal structures used for the parameterizations and simulations in Cu-ATC, Cu-bptc and Cu-mbtc herein were taken from ref. 23, 25 and 34, respectively (refcodes BIMDIL, SUKYIH and LASYOU from the Cambridge Structure Database (CSD)). The adsorption simulation was performed using the Materials Studio. All giant canonical Monte Carlo (GCMC) calculations in this work were accomplished by Sorption package in Materials Studio. The Universal Force field was used to describe MOF parameters. The MOFs symmetry was changed to P1. To get stable geometry, optimizations were obtained using a Forcite module, GCMC calculations were performed by Sorption module where Universal forcefield and Metropolis method were used. L-J 12-6 potential was used to describe the van der Waals interactions between MOF and adsorbate materials, while Ewald summation method described the electrostatic interactions. The equilibrium steps were set as 1×106 and 1×107 production steps for sampling thermodynamic properties.

Following the determination of H₂ adsorption sites within these MOFs, we conducted density functional theory (DFT) calculations to quantify adsorption energies at each identified site. All computations All calculations in this work were accomplished by Dmol3 package in Materials Studio with DNP basis set. As for the exchange-correlation functional, the GGA-PW91 method was chosen, which has been confirmed appropriate for our system in previous works. 6-8 The space cut-off radius was set as 4.5 Å and OBS method was adopted for DFT-D correction. The geometry optimization was performed until the energy, force and displacement on each atom was converged to less than 2.0×10−5 Ha, 4.0×10−3 Ha/Å, 5.0×10−3 Å, respectively. The molecule adsorption energy (Eads) was defined according to the following equation:

Eads = EMOF/H2 - EMOF – EH2

where EMOF/H2 represents the total energy when “H₂” molecule adsorbed on MOFs, EMOF means the energy of MOFs with no “H₂” molecule adsorption, while EH2 is the energy of dissociative “H₂” molecules.

In VASP, 9-12 the electronic exchange-correlation has been treated using the Perdew–Burke–Ernzerhof (PBE) functional within the generalized gradient approximation (GGA). 13 The interaction between atomic nuclei and valence electrons has been modeled using projector augmented wave (PAW) pseudopotentials, with a plane-wave cutoff energy set to 500 eV. 14 The convergence criterion for self-consistent iterations is set to 1.0 × 10-5 eV, and structural optimization is considered complete when forces on all atoms are less than 0.02 eV/Å-1. A 3 × 3 × 2 k-point mesh is used for all calculations. The computational models used in this study have been constructed based on the Cu-ATC model and the D2 molecule is put between two Cu atoms of Cu-ATC, and the lattice parameters of the constructed models are a = b = 8.467 Å, c = 14.444 Å while α = β = γ = 90° (see Figure 13a). The adsorption energies are calculated using the following equation:

Eads = - (Etotal - ECu - ED2)

Here, Etotal, ECu, and ED2 represent energies of D2 adsorbed in the Cu-ATC model, the Cu-ATC model itself, and D2 molecules, respectively. The charge density difference (CDD) is calculated using VASPKIT (see Figure 13b). 15

The adsorption energy for D2 molecule is calculated to be 0.1636 eV and the CDD indicates the interaction between the D2 molecules and the Cu atoms.

**
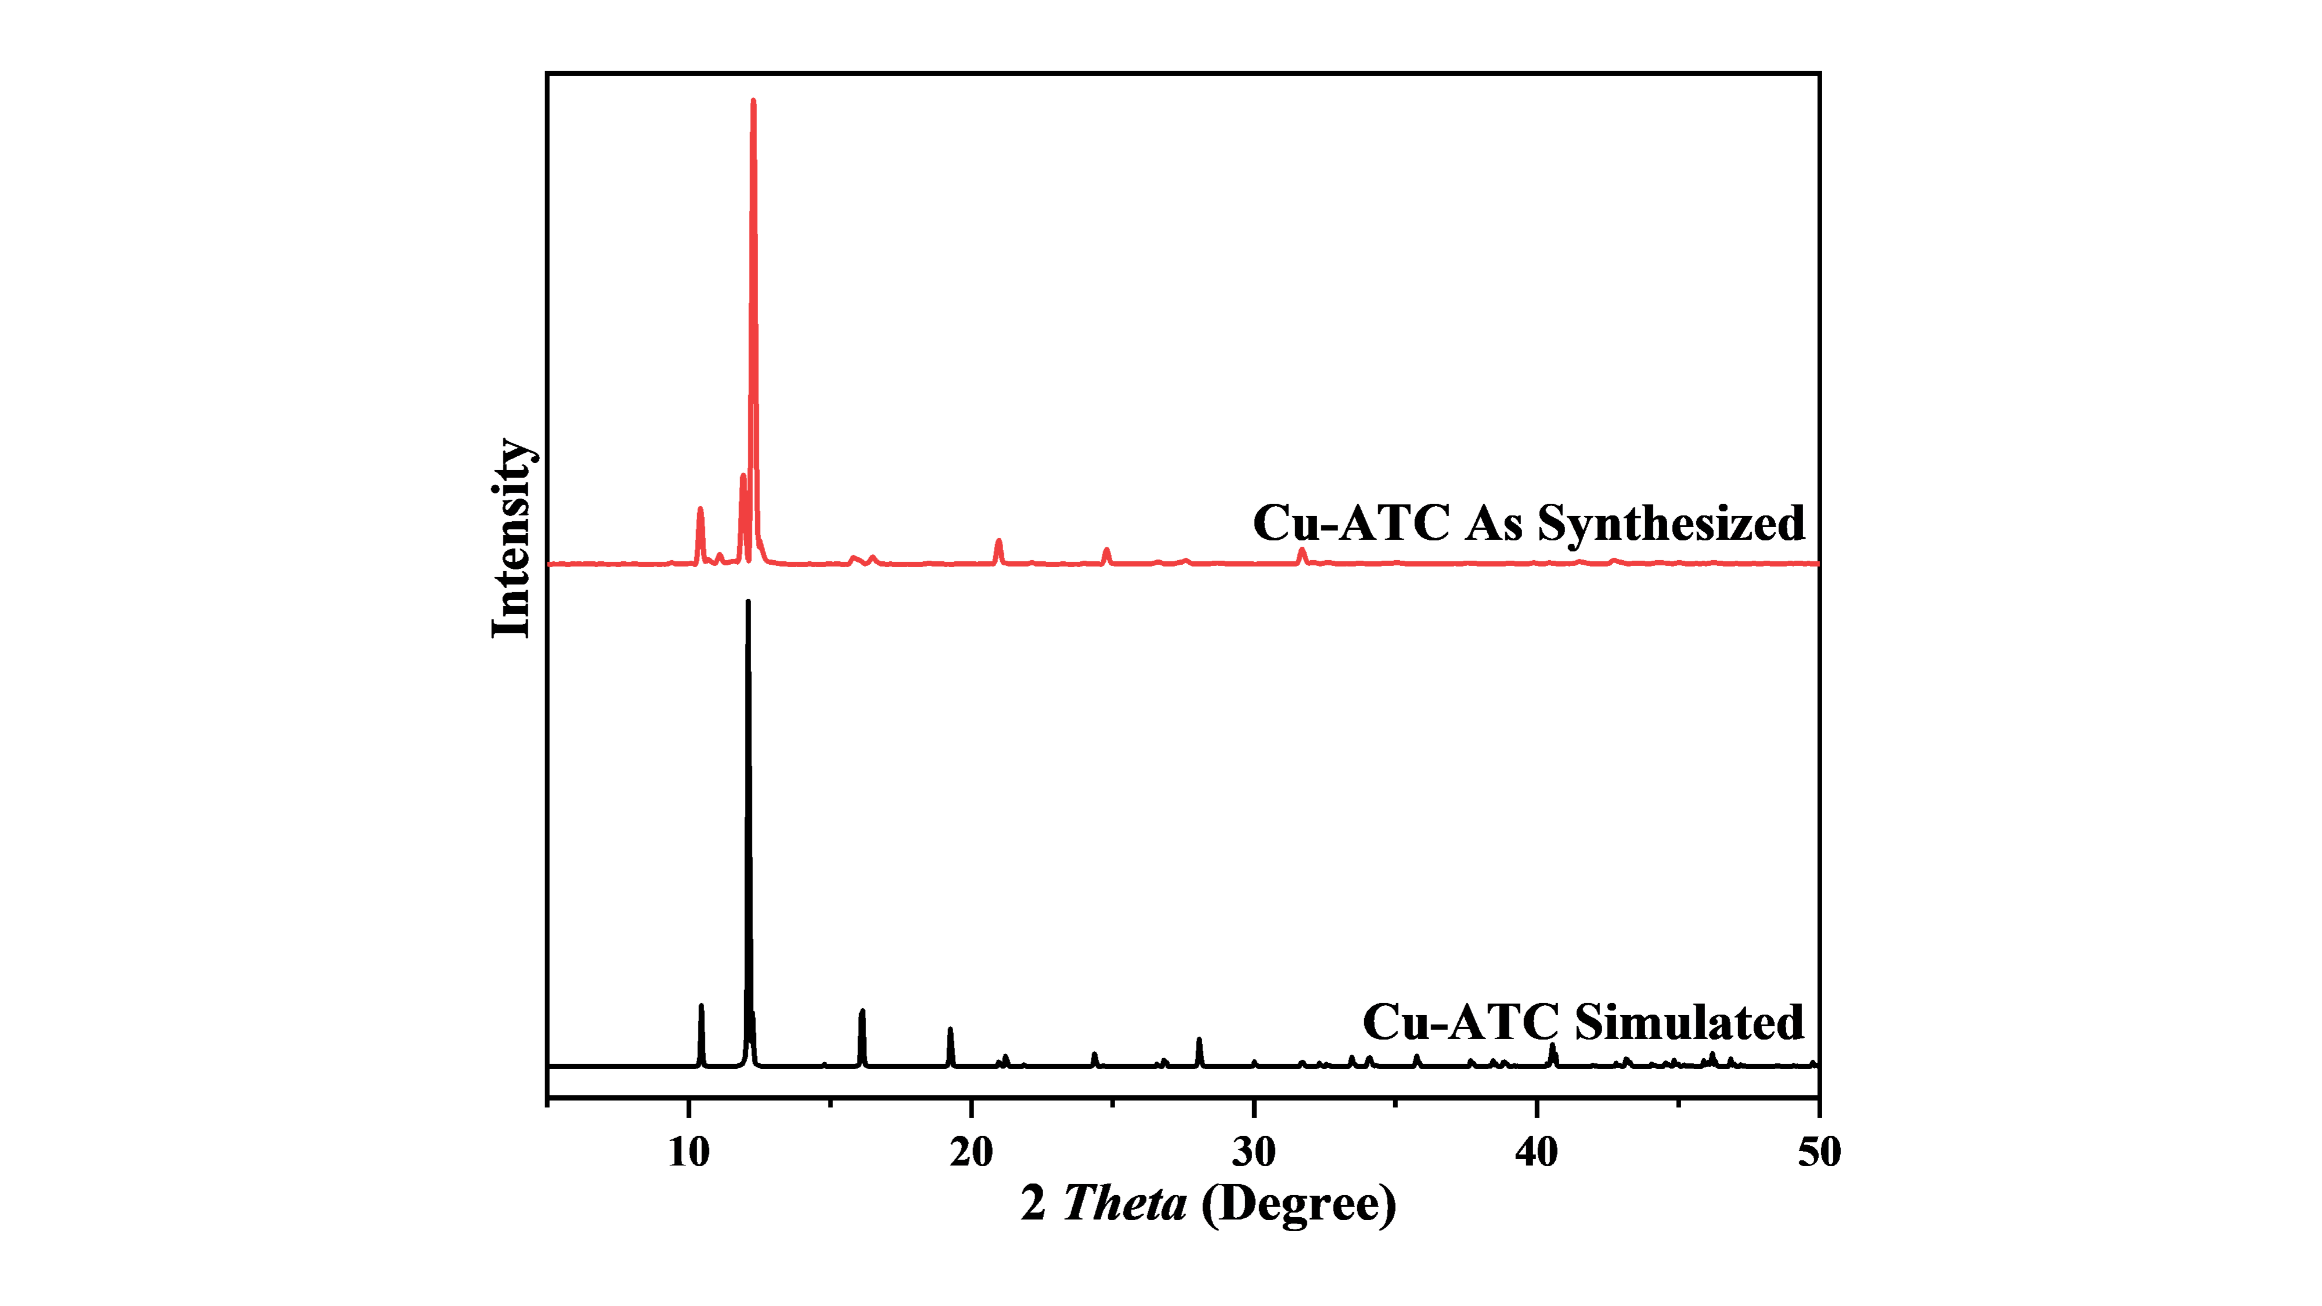
**

**Figure S1.** The calculated and synthesized PXRD patterns of Cu-ATC.

**
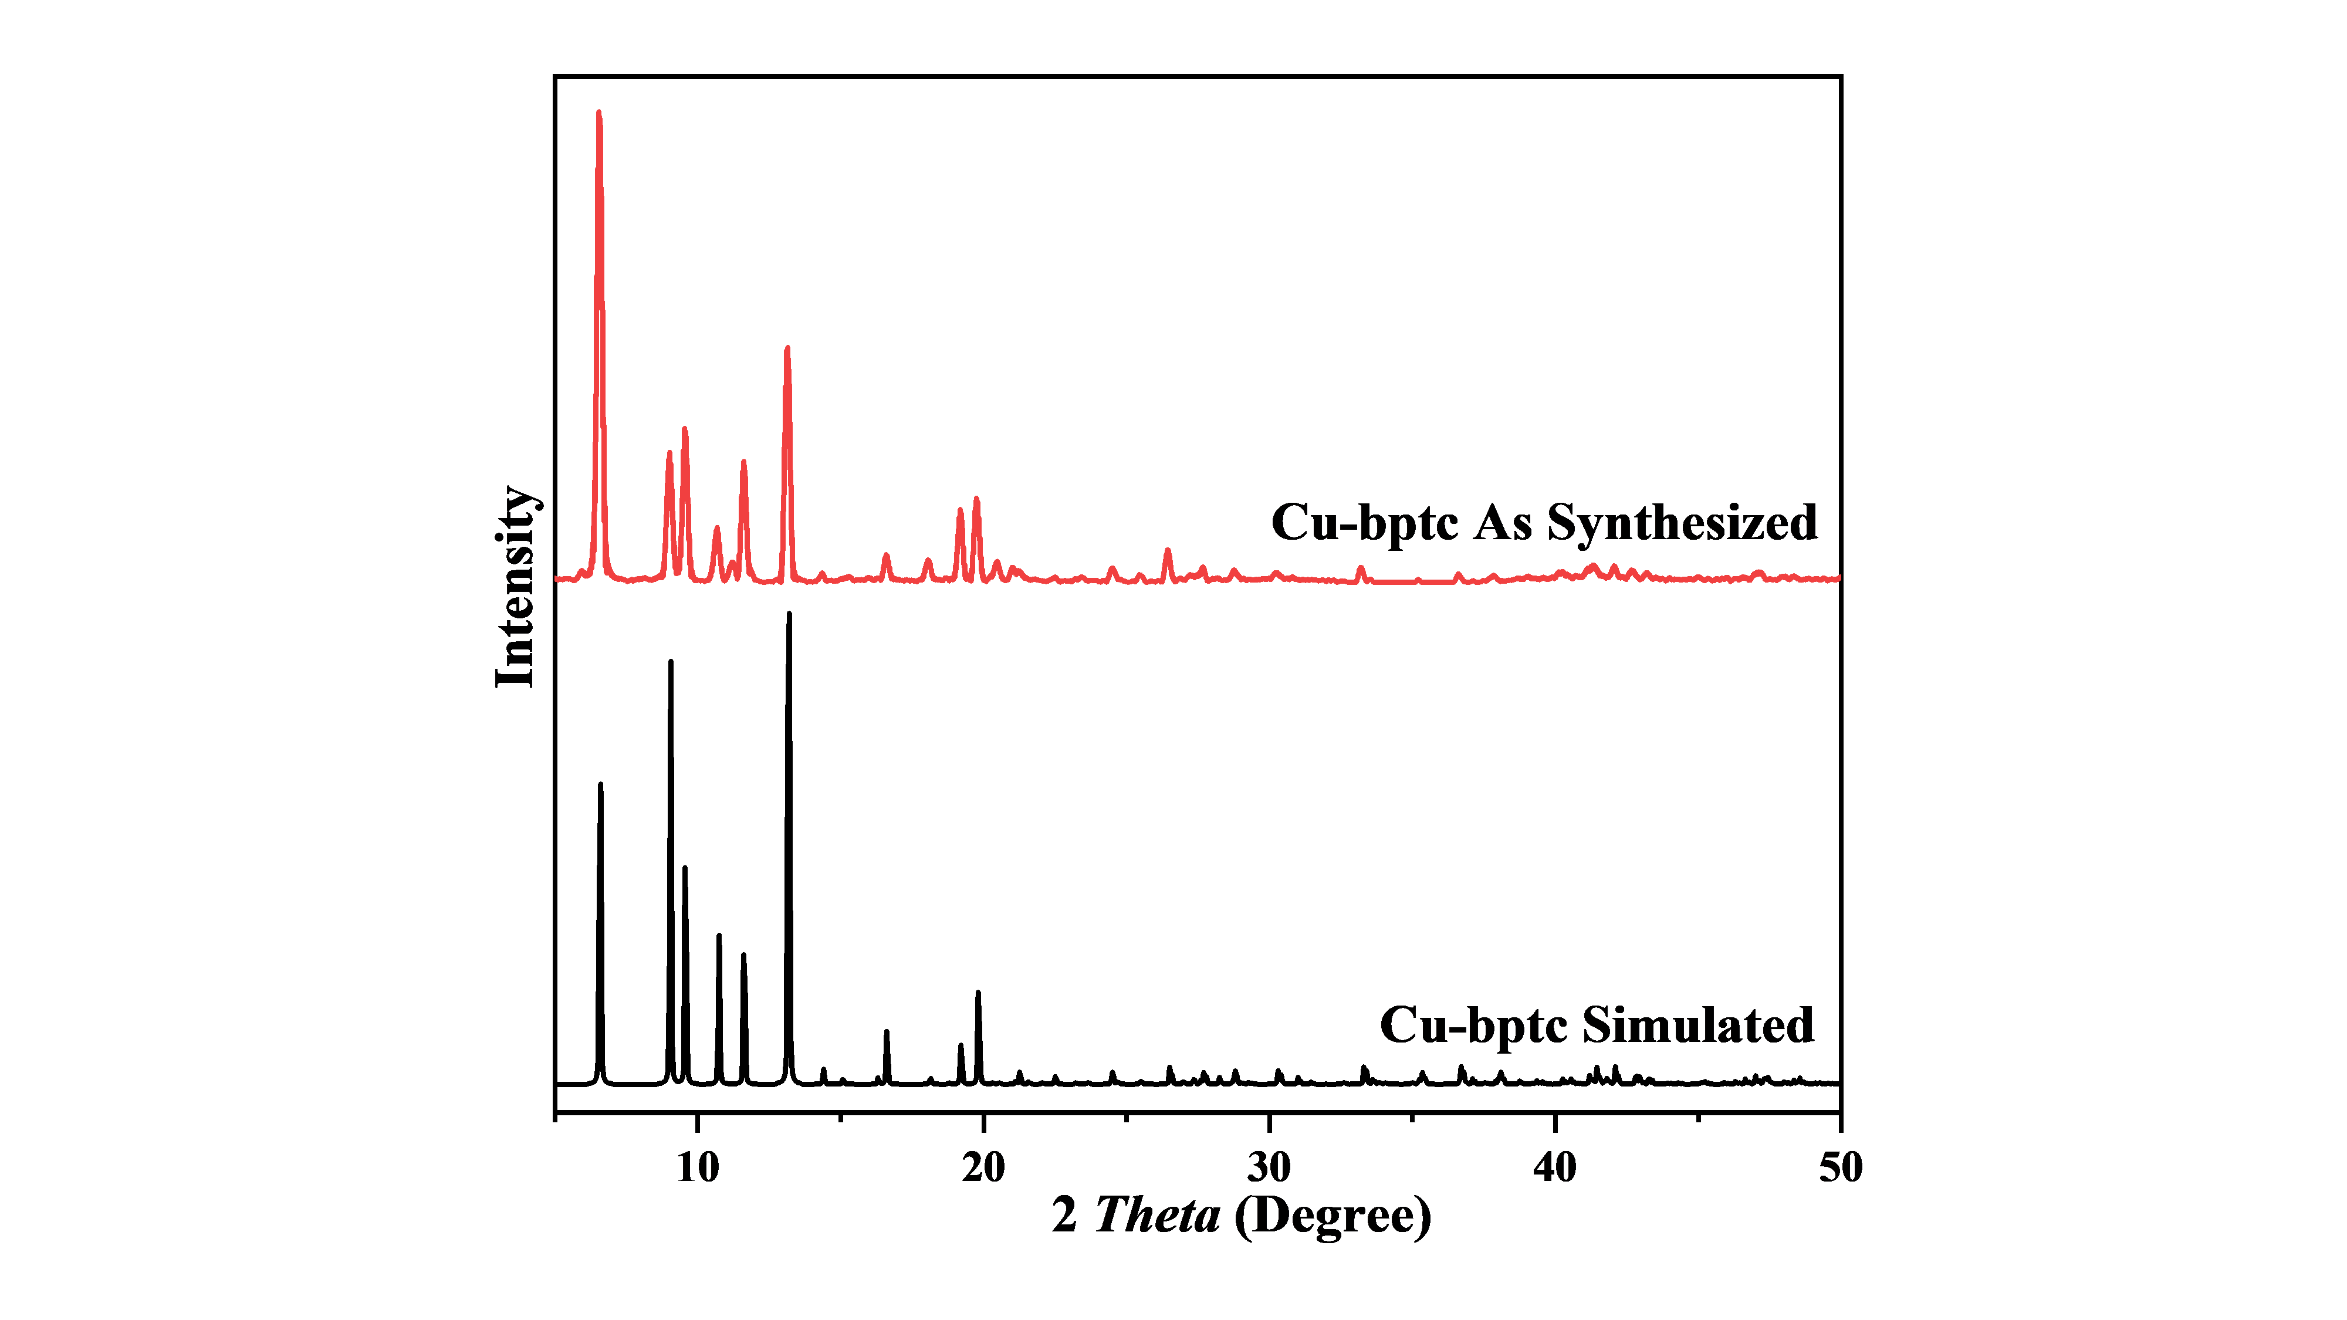
**

**Figure S2.** The calculated and synthesized PXRD patterns of Cu-bptc.

**
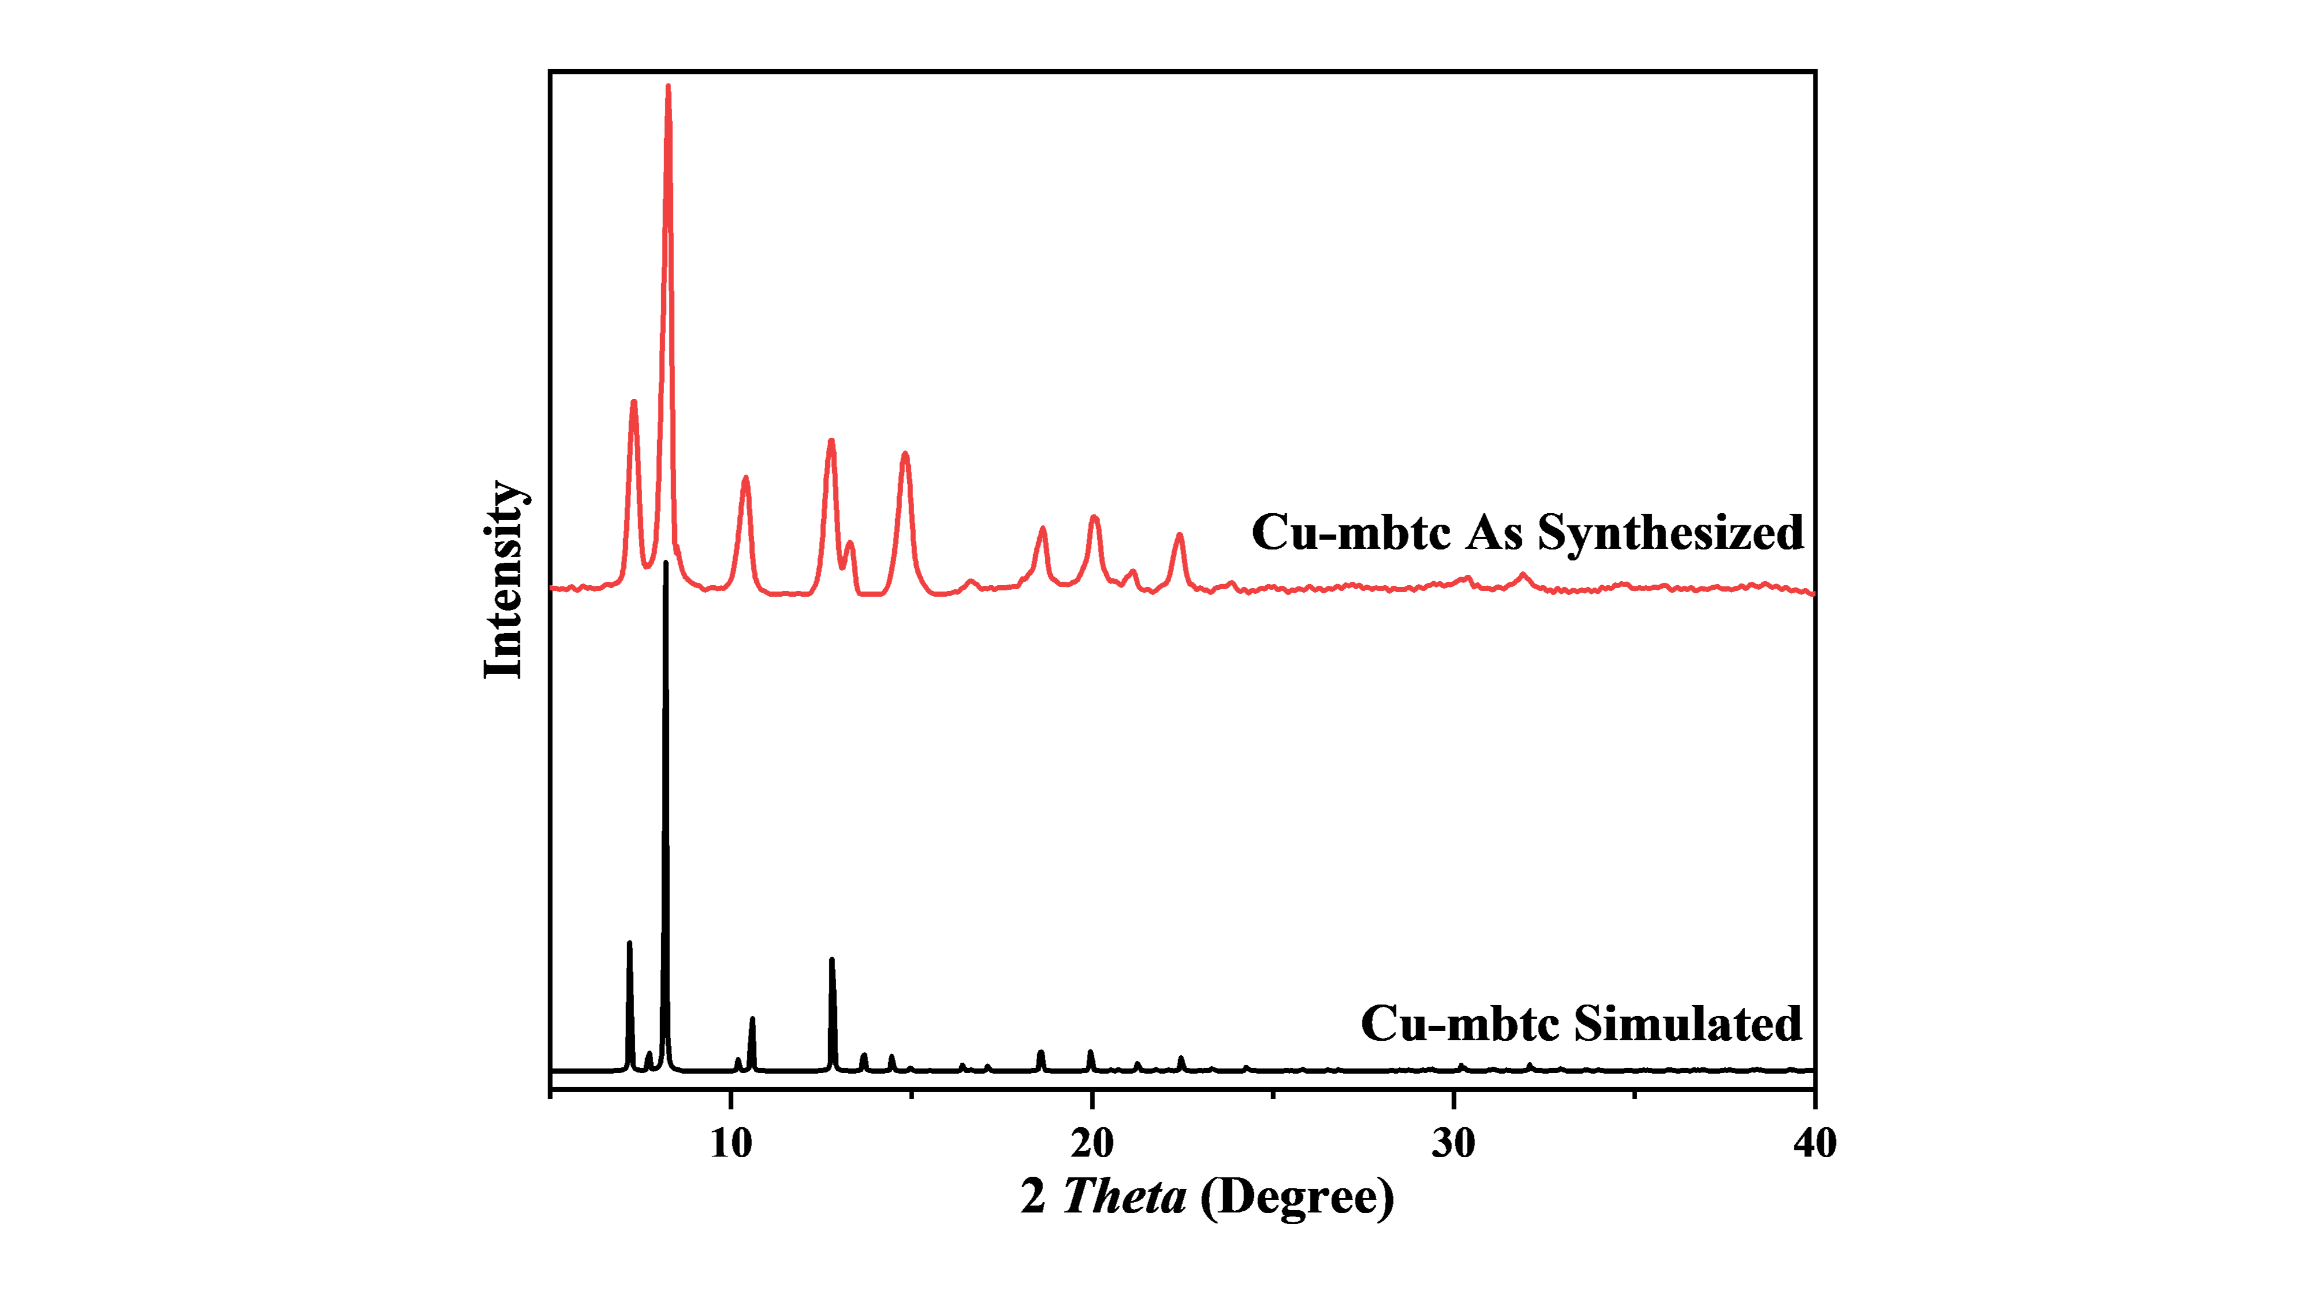
**

**Figure S3.** The calculated and synthesized PXRD patterns of Cu-mbtc.

**
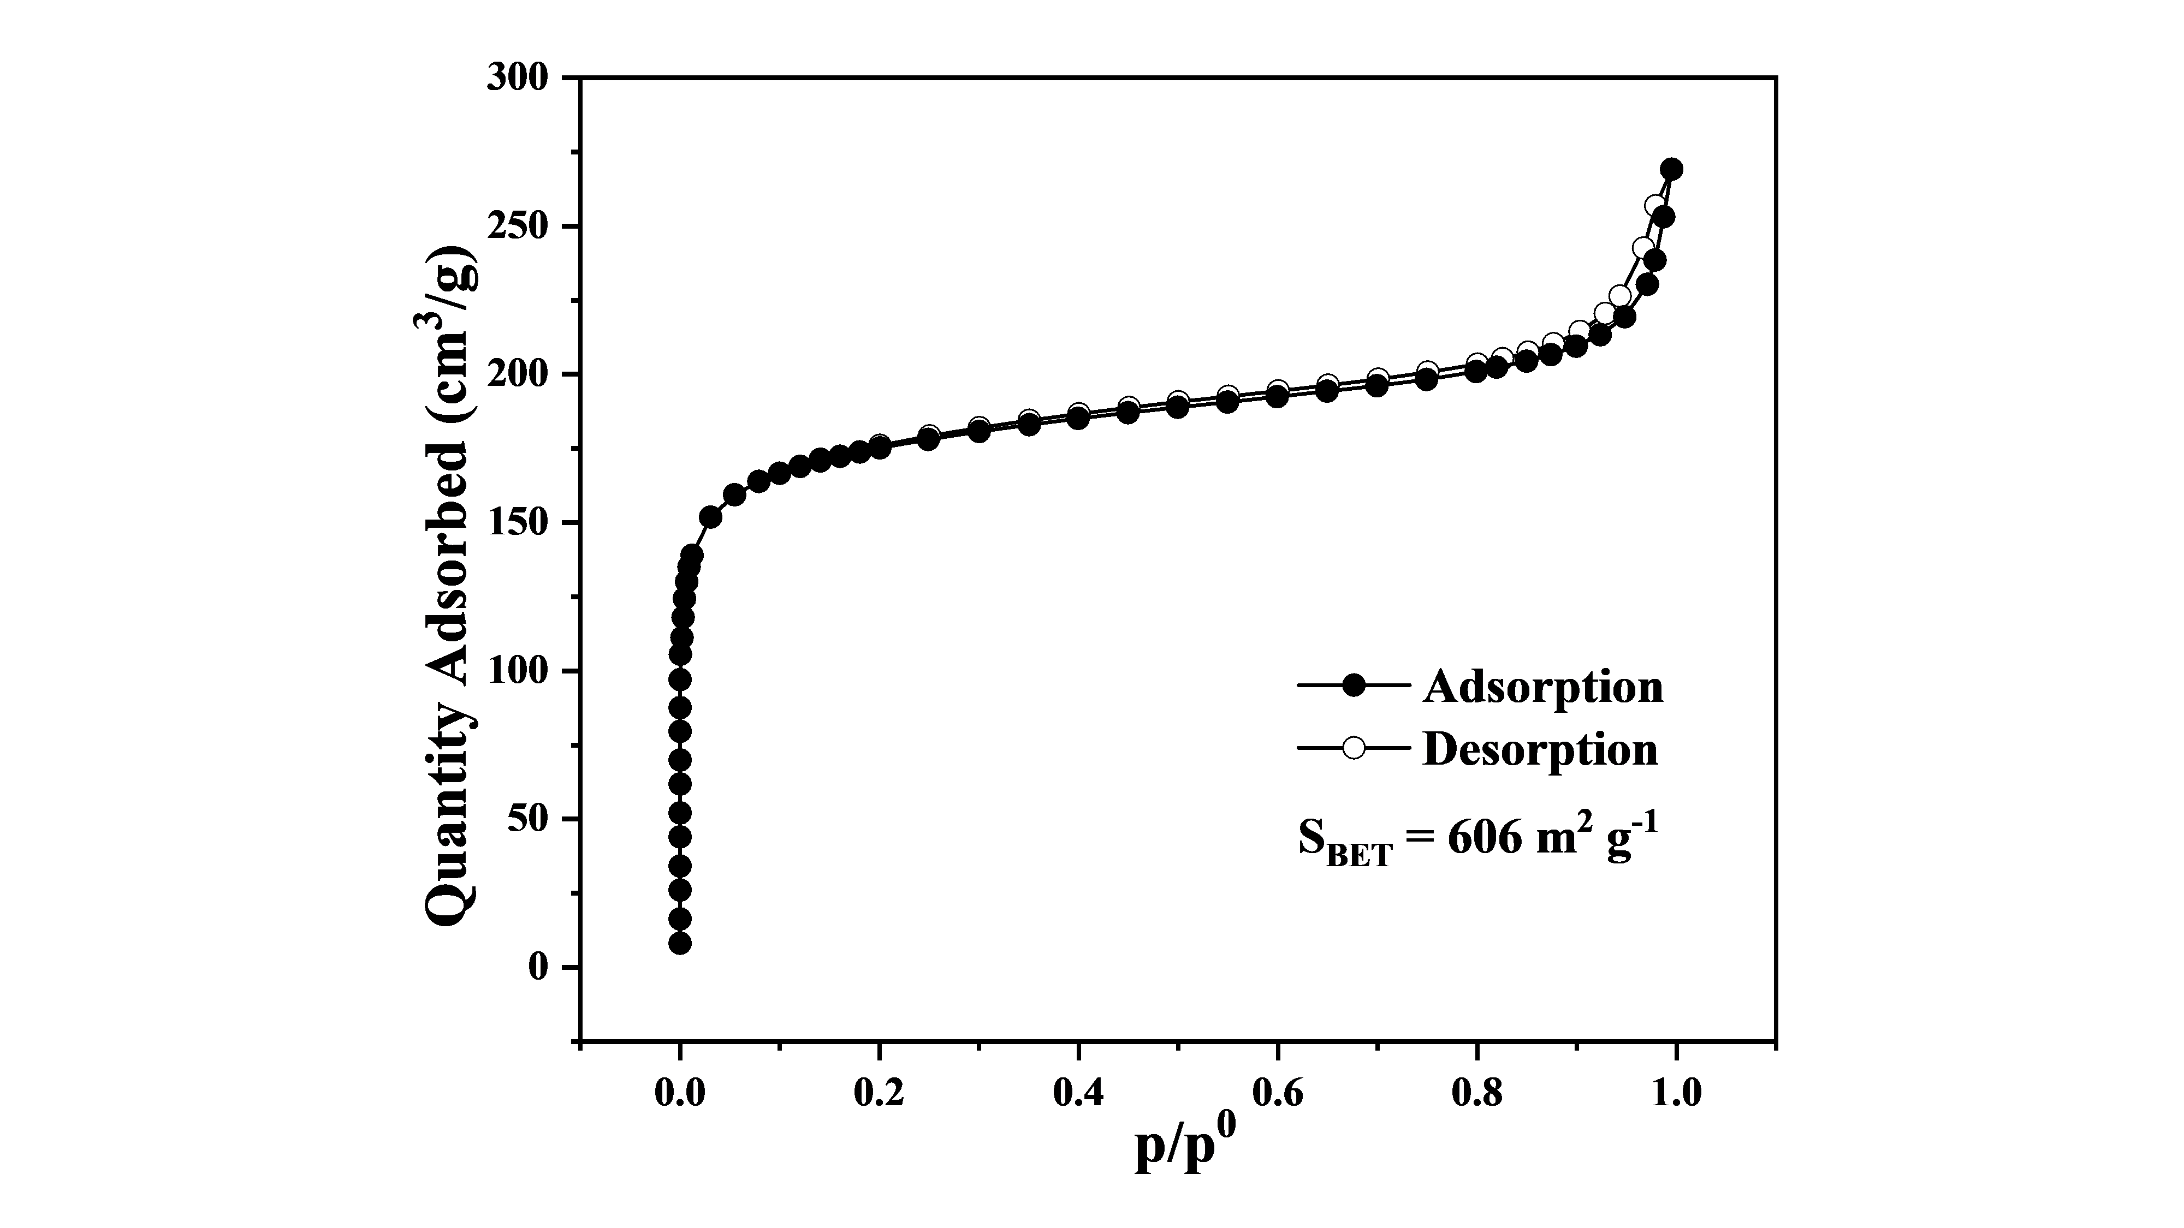
**

**Figure S4.** N2 isotherm for Cu-ATC at 77 K.

**
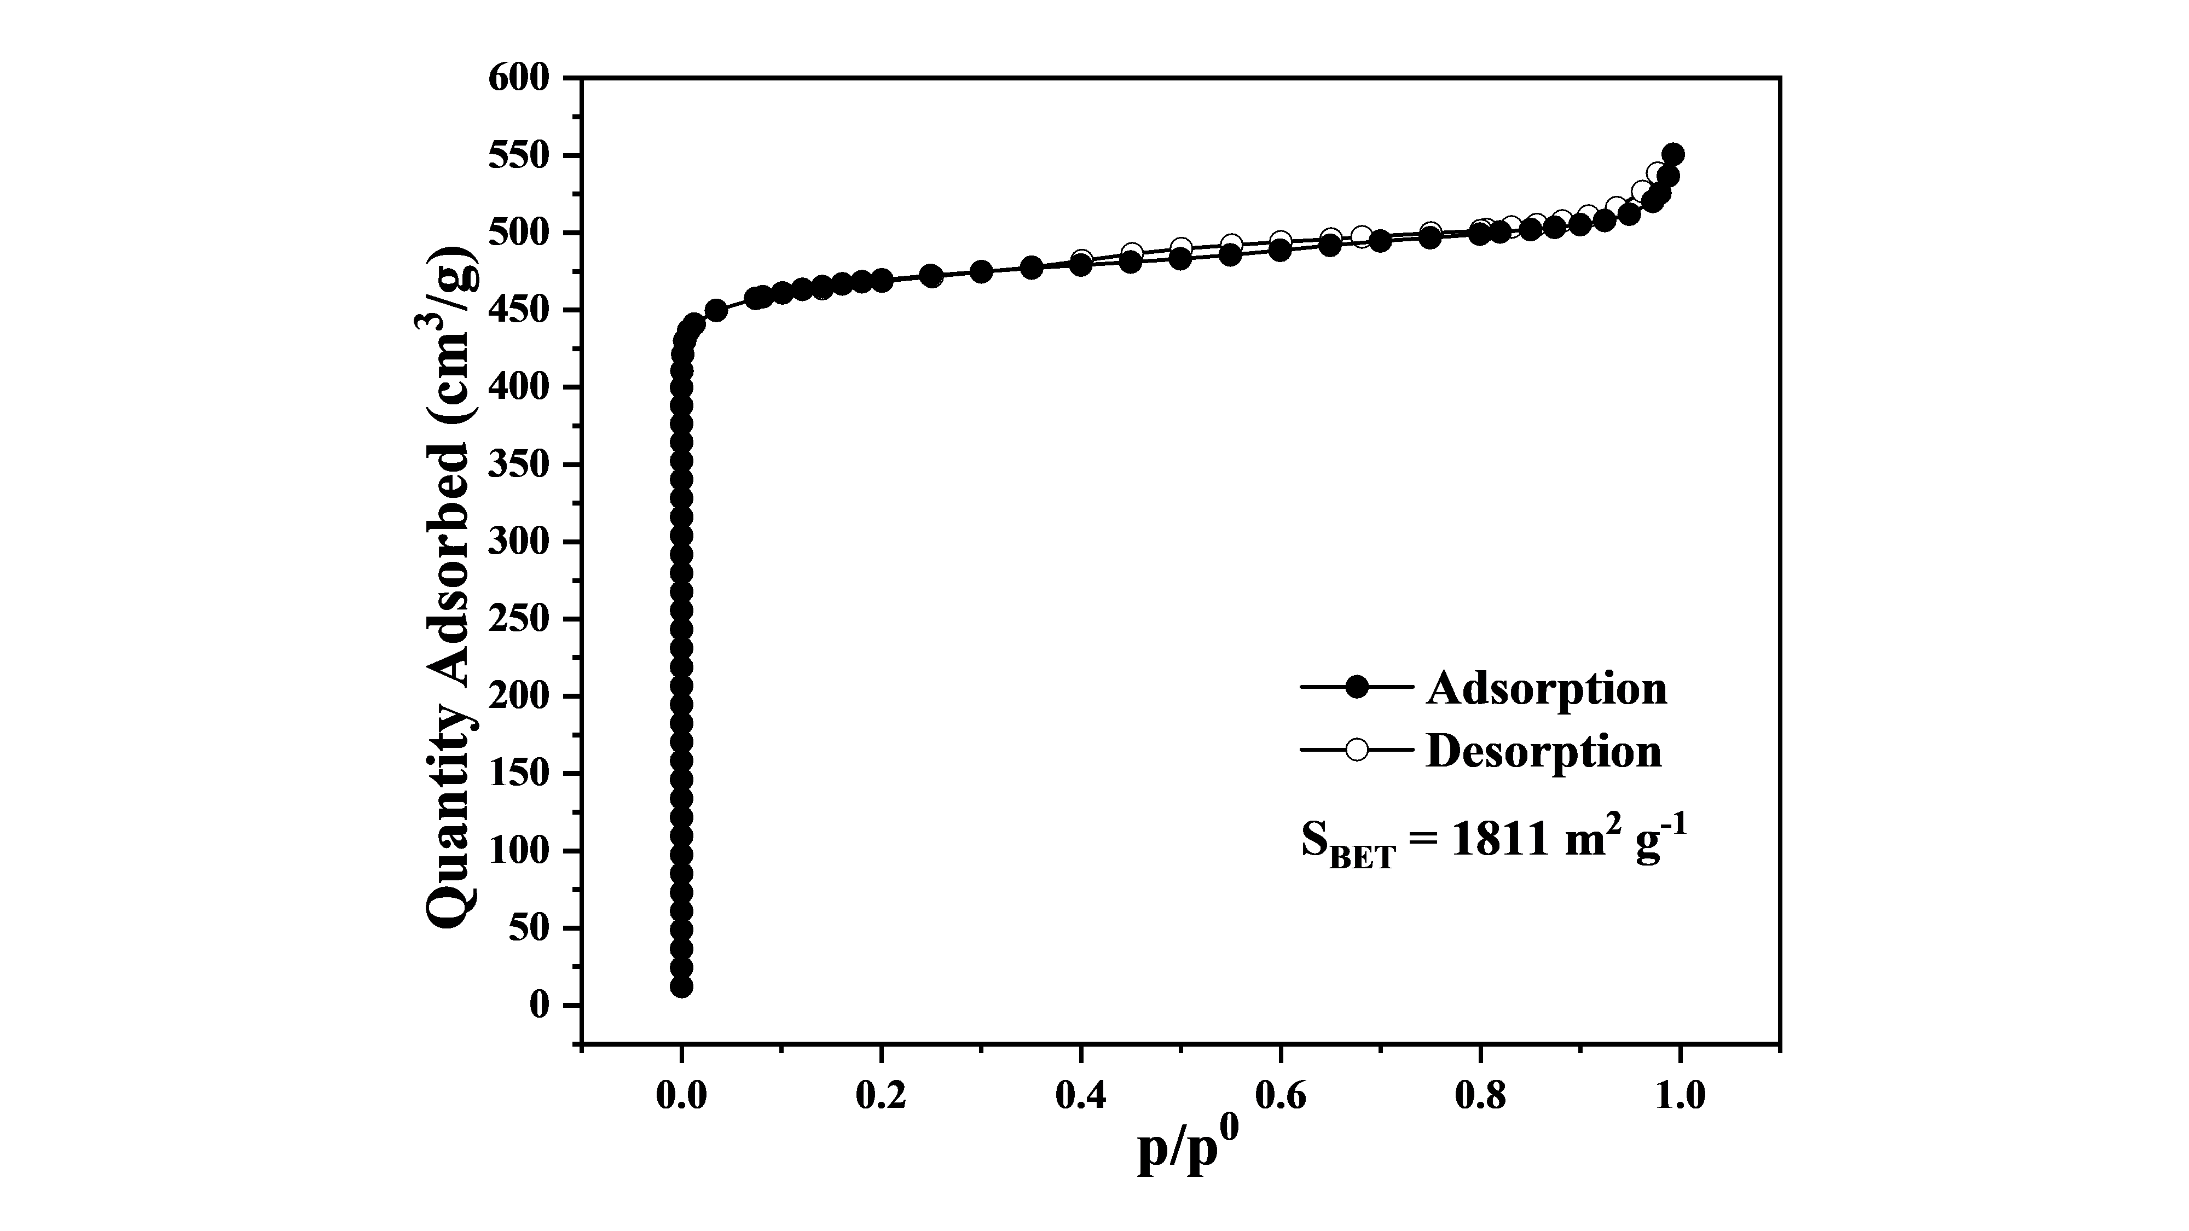
**

**Figure S5.** N2 isotherm for Cu-bptc at 77 K.

**
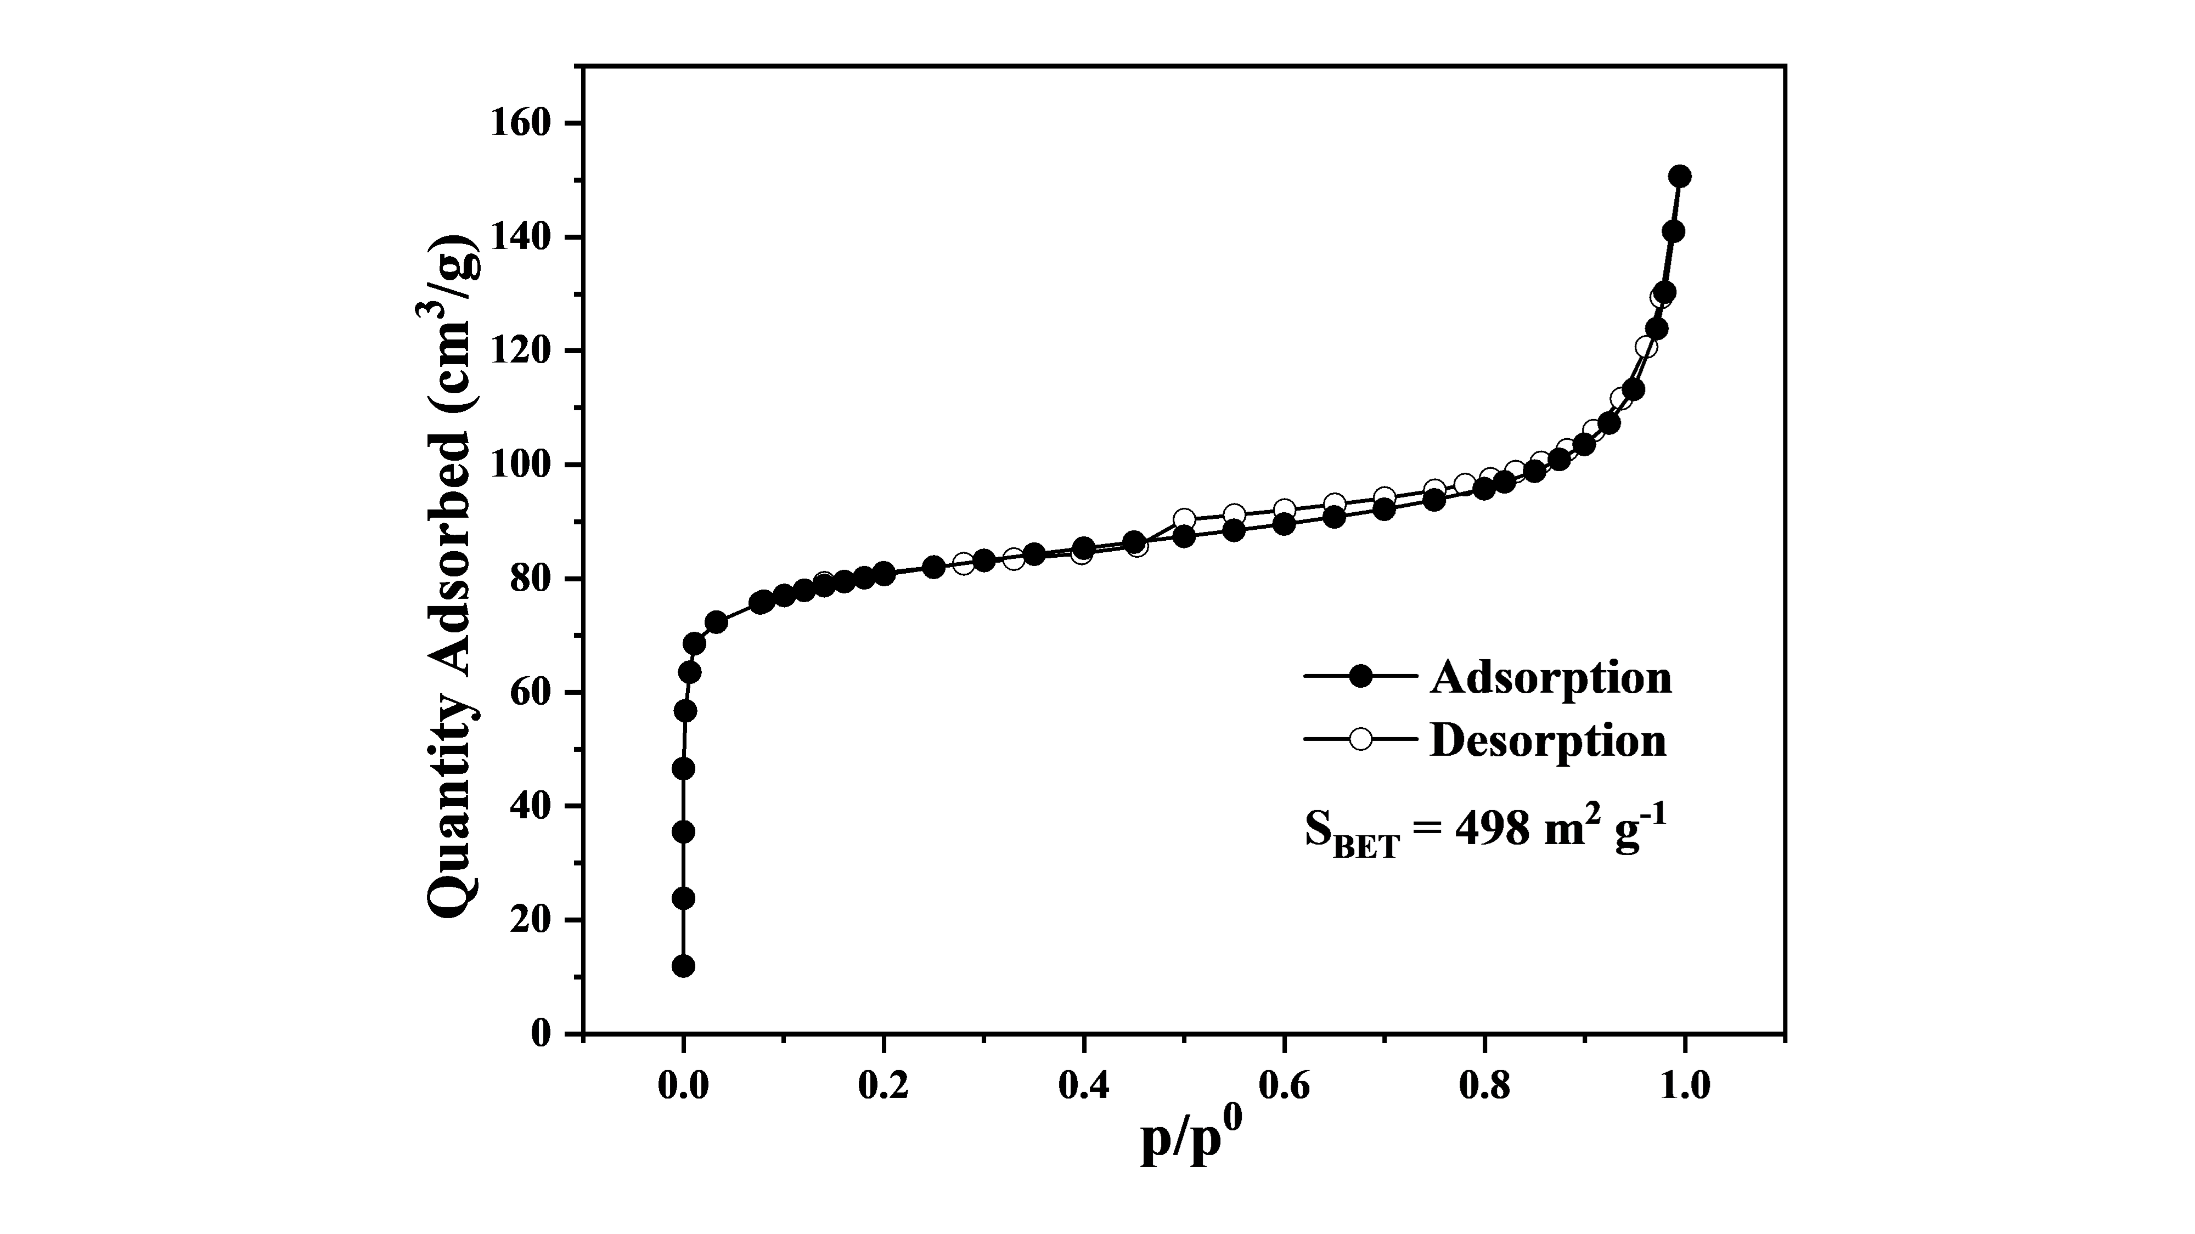
**

**Figure S6.** N2 isotherm for Cu-mbtc at 77 K.

**
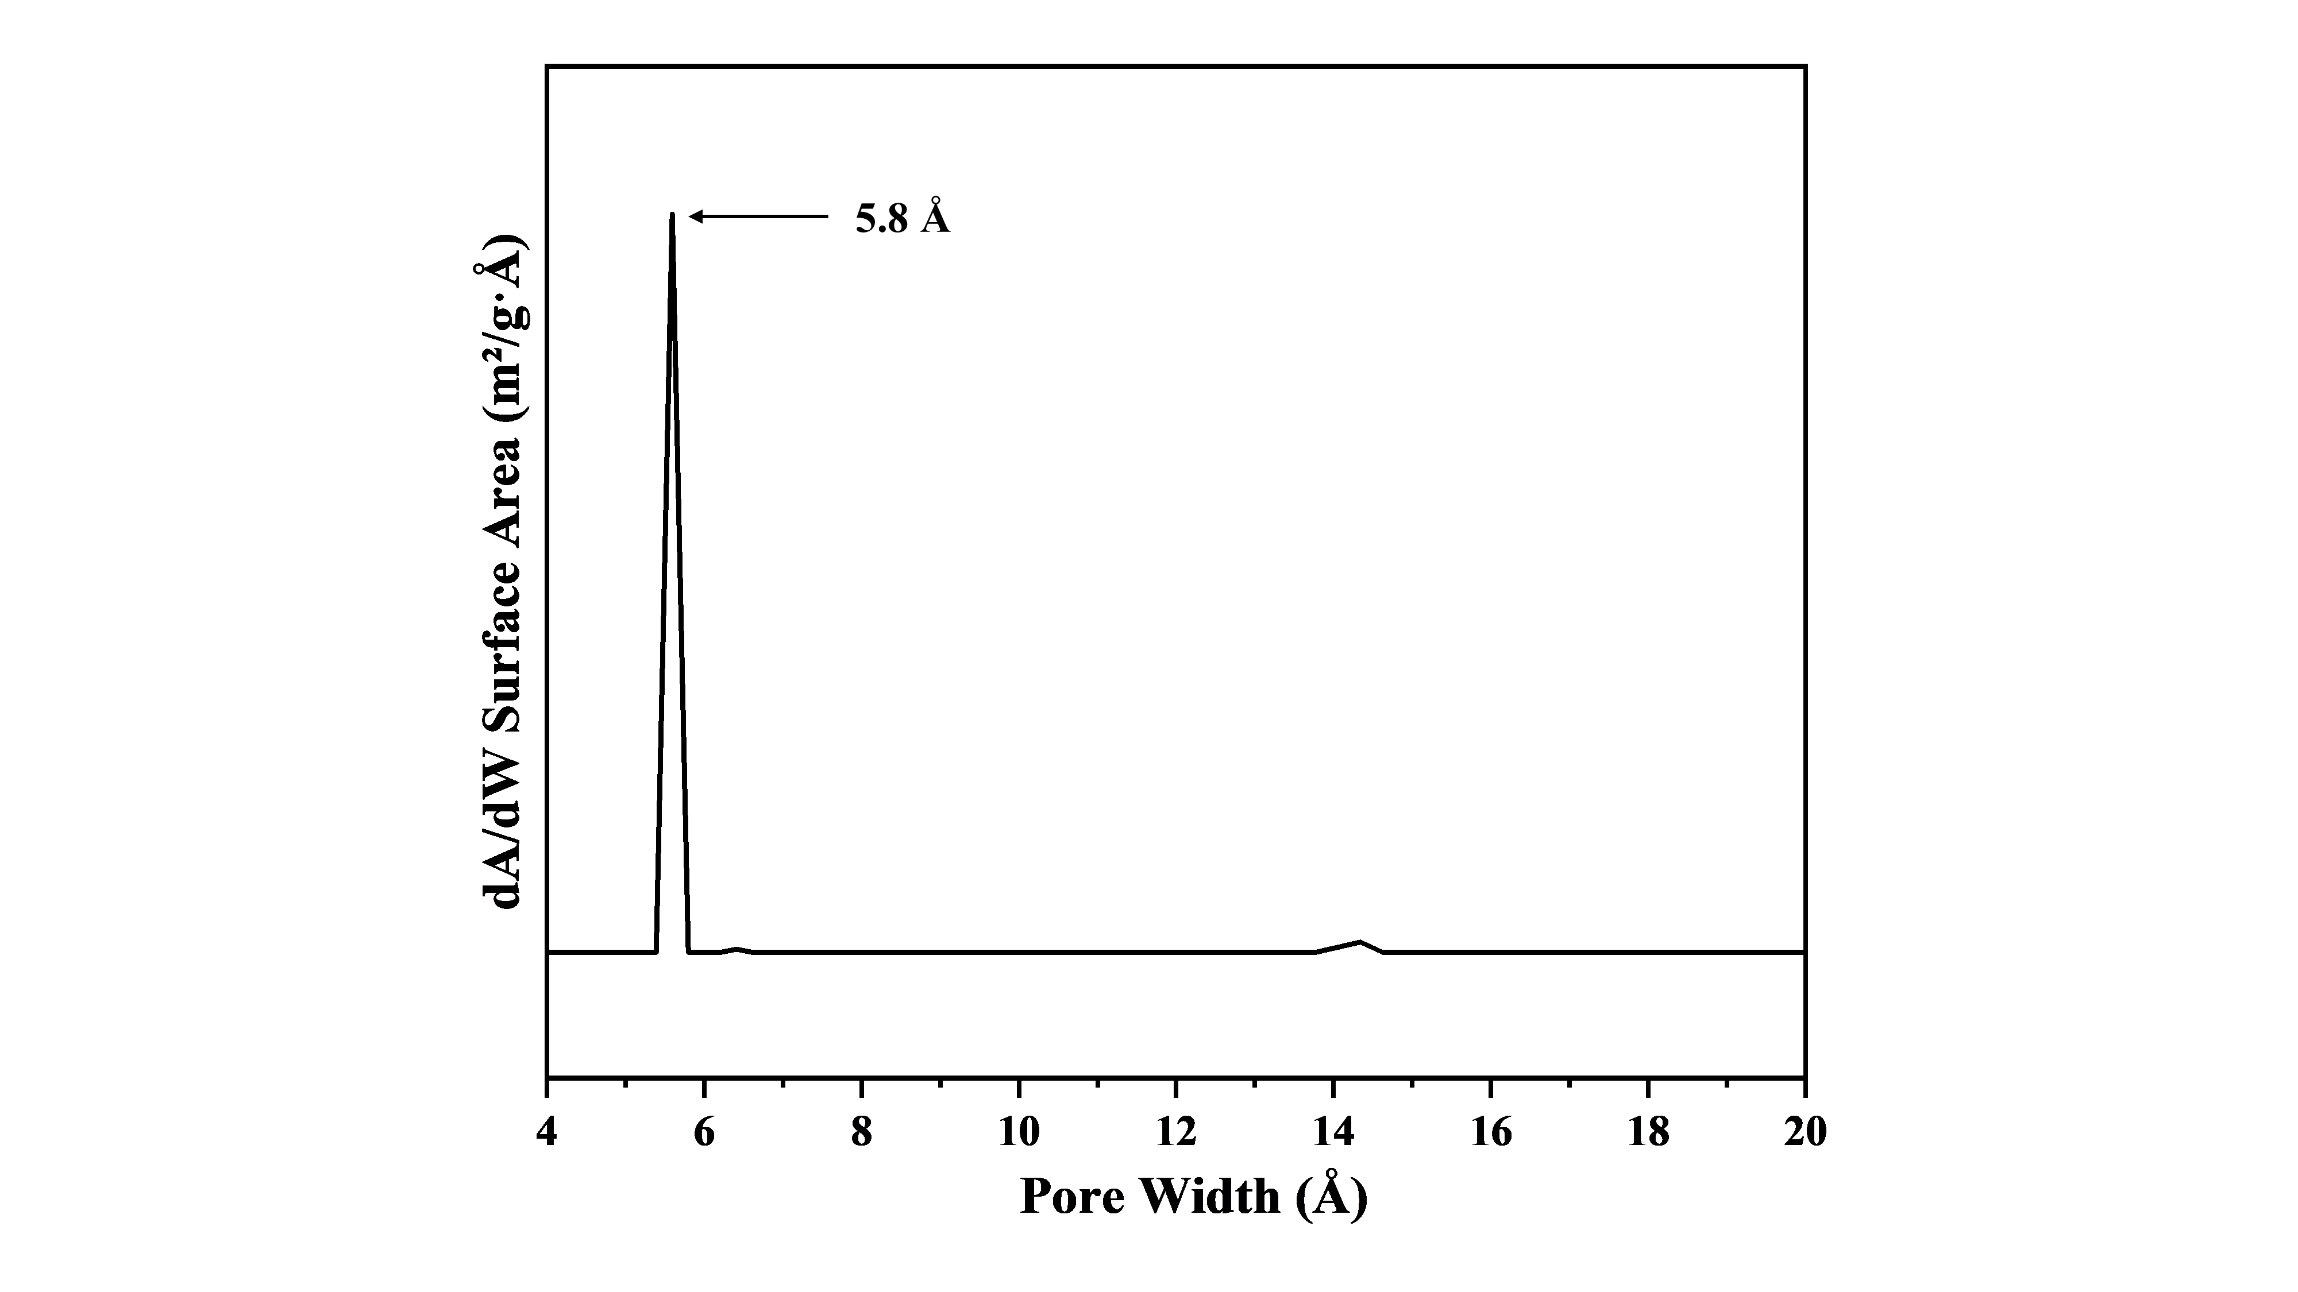
**

**Figure S7.** Pore size distributions from NLDFT method of Cu-ATC.

**
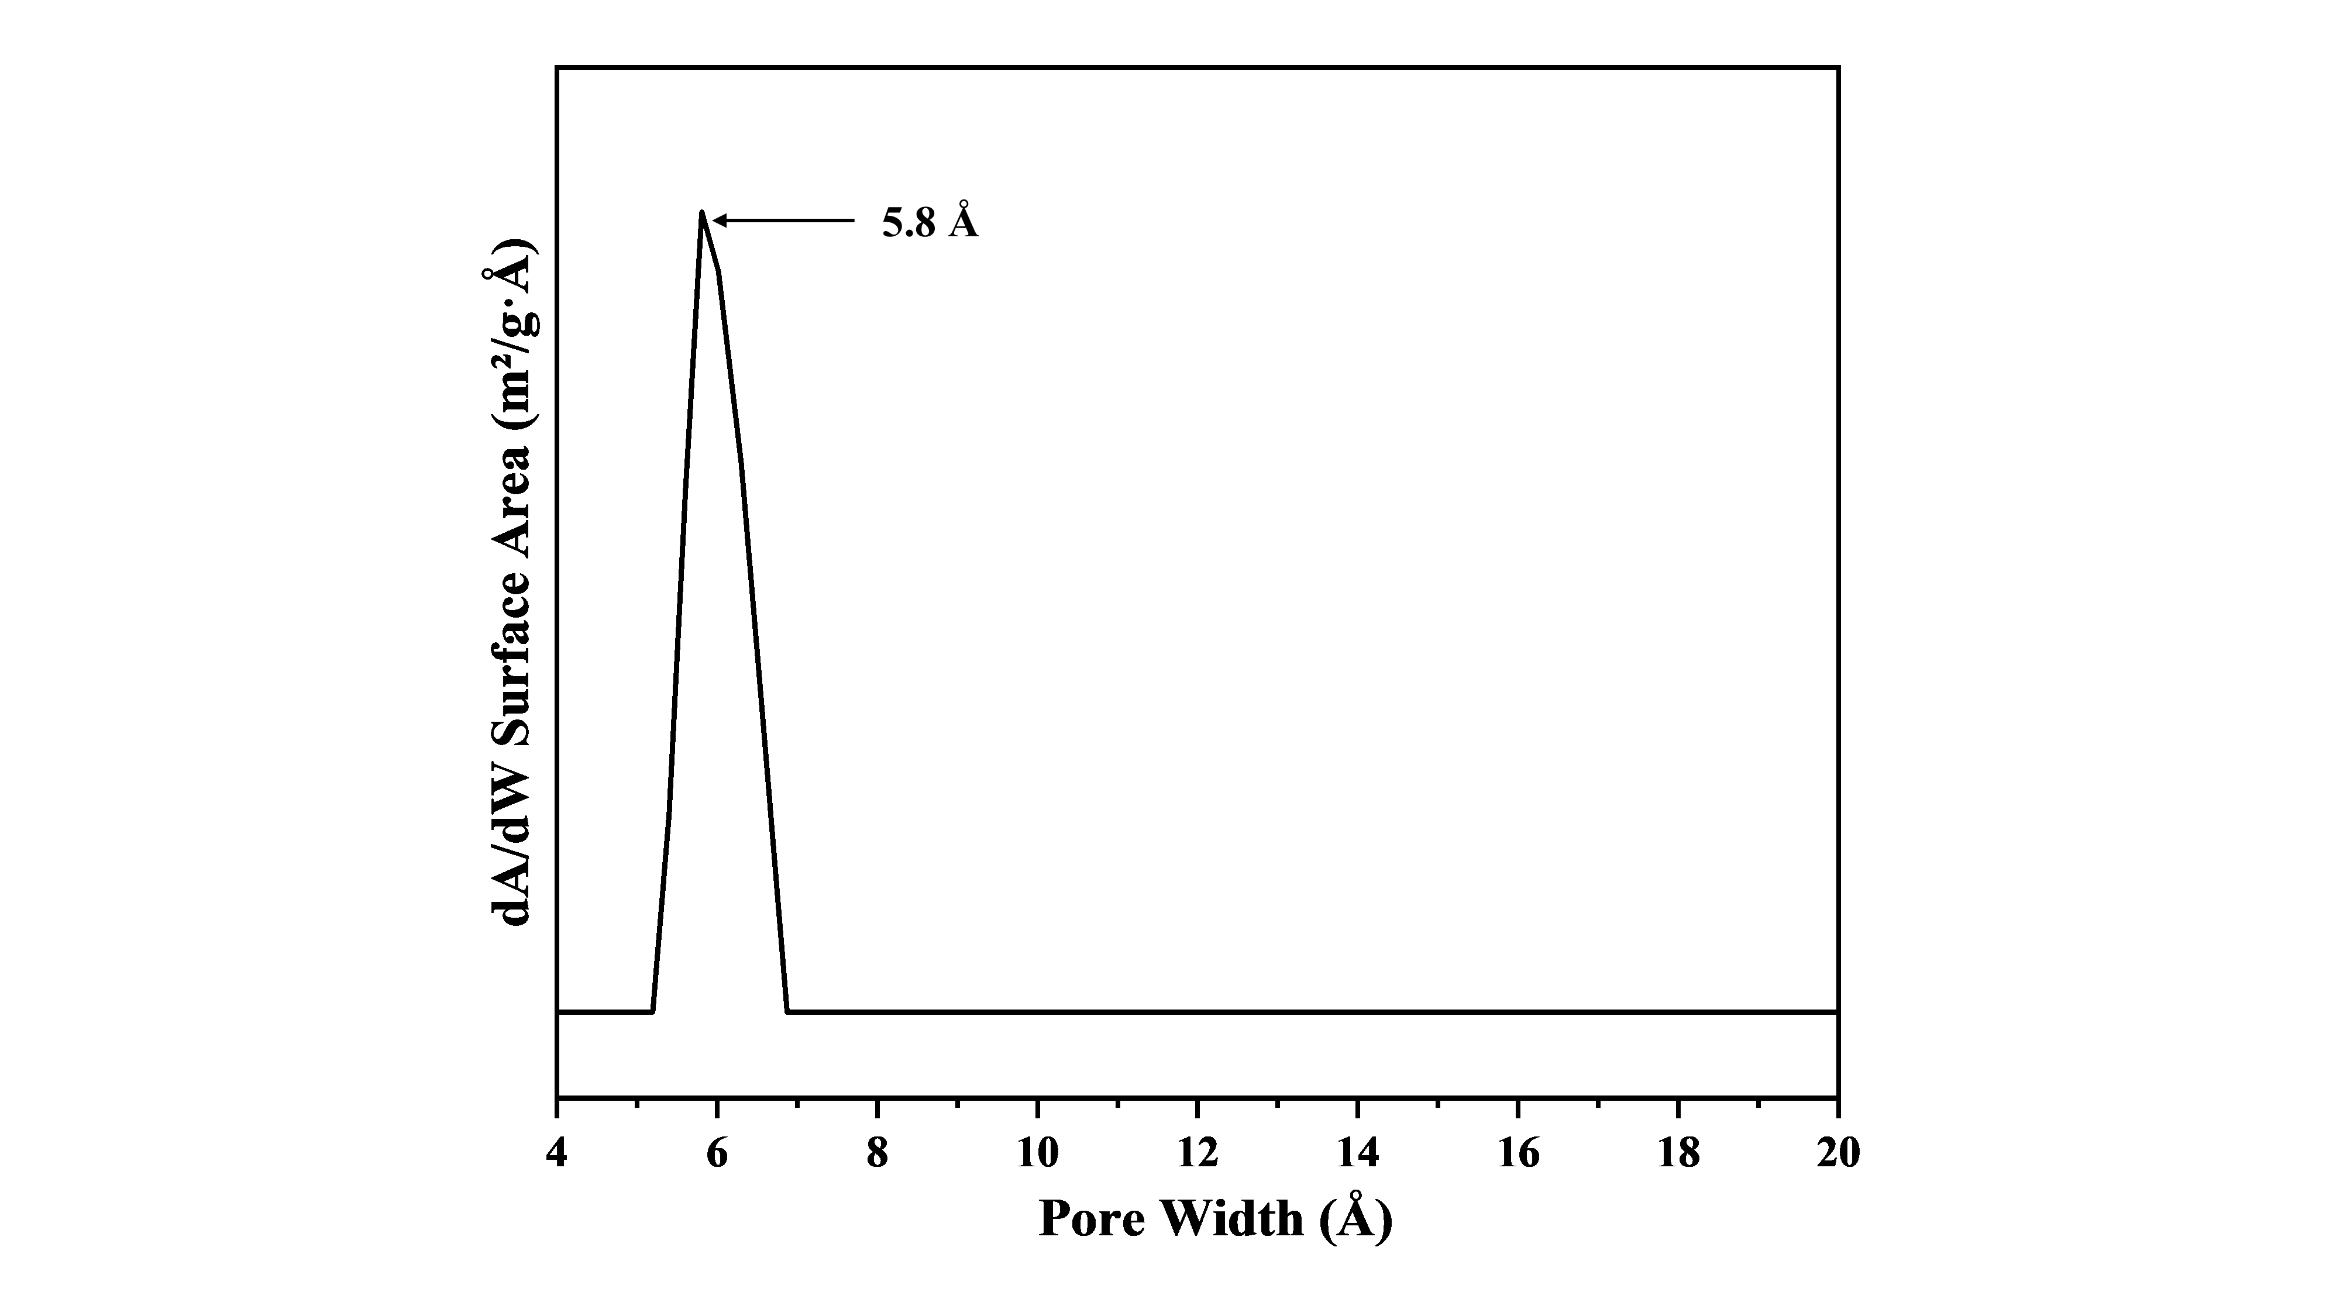
**

**Figure S8.** Pore size distributions from NLDFT method of Cu-bptc.

**
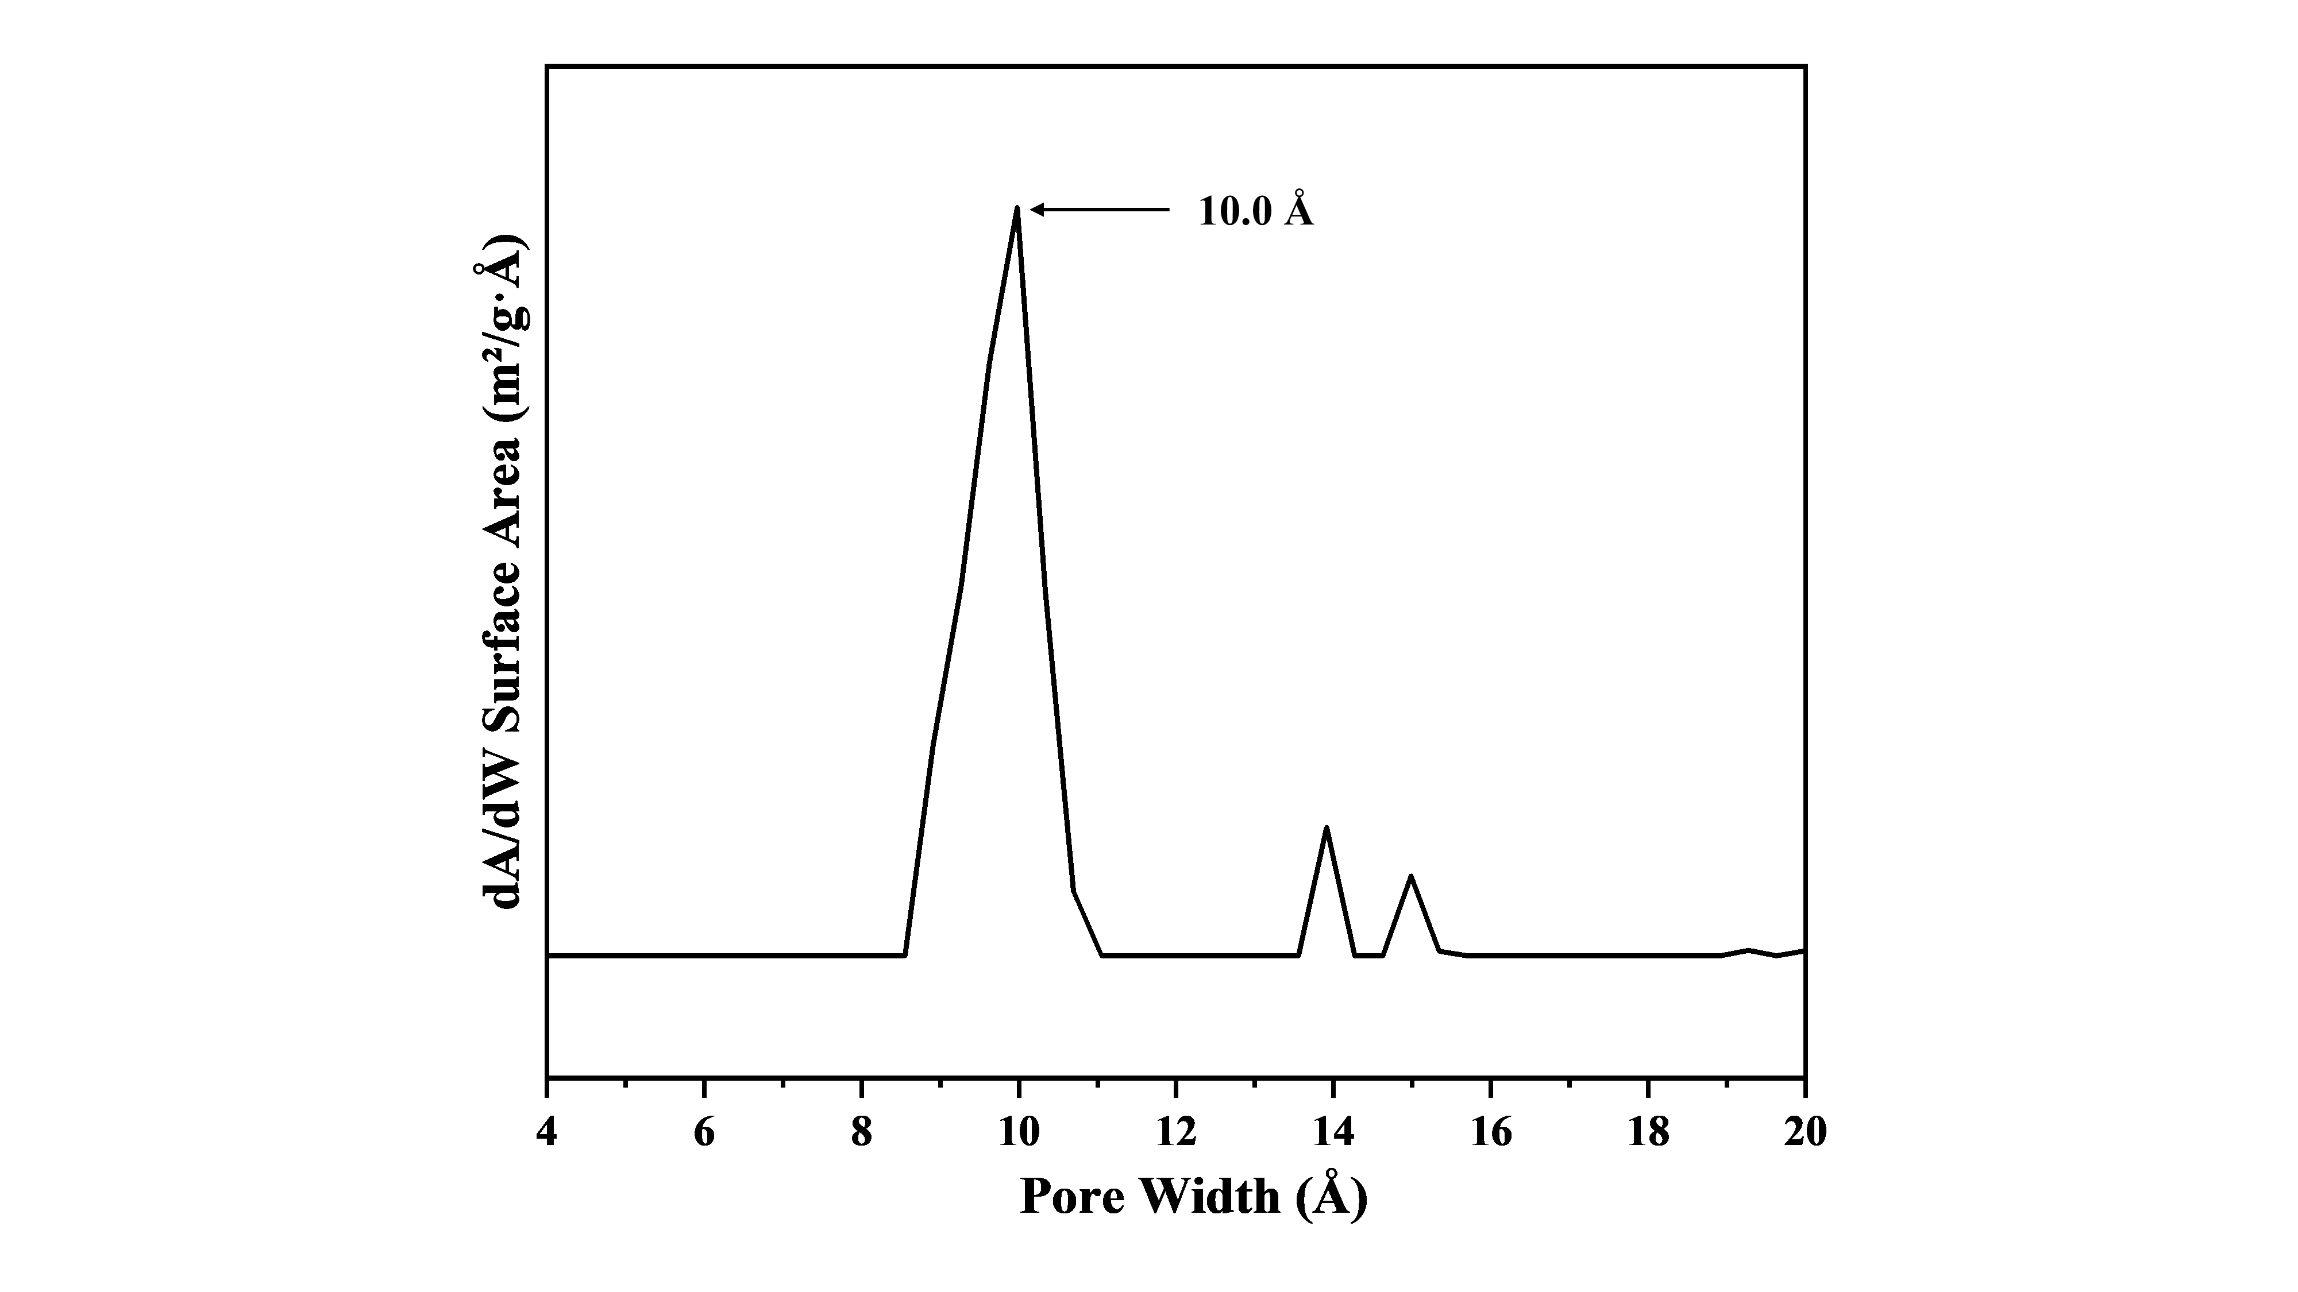
**

**Figure S9.** Pore size distributions from NLDFT method of Cu-mbtc.

**
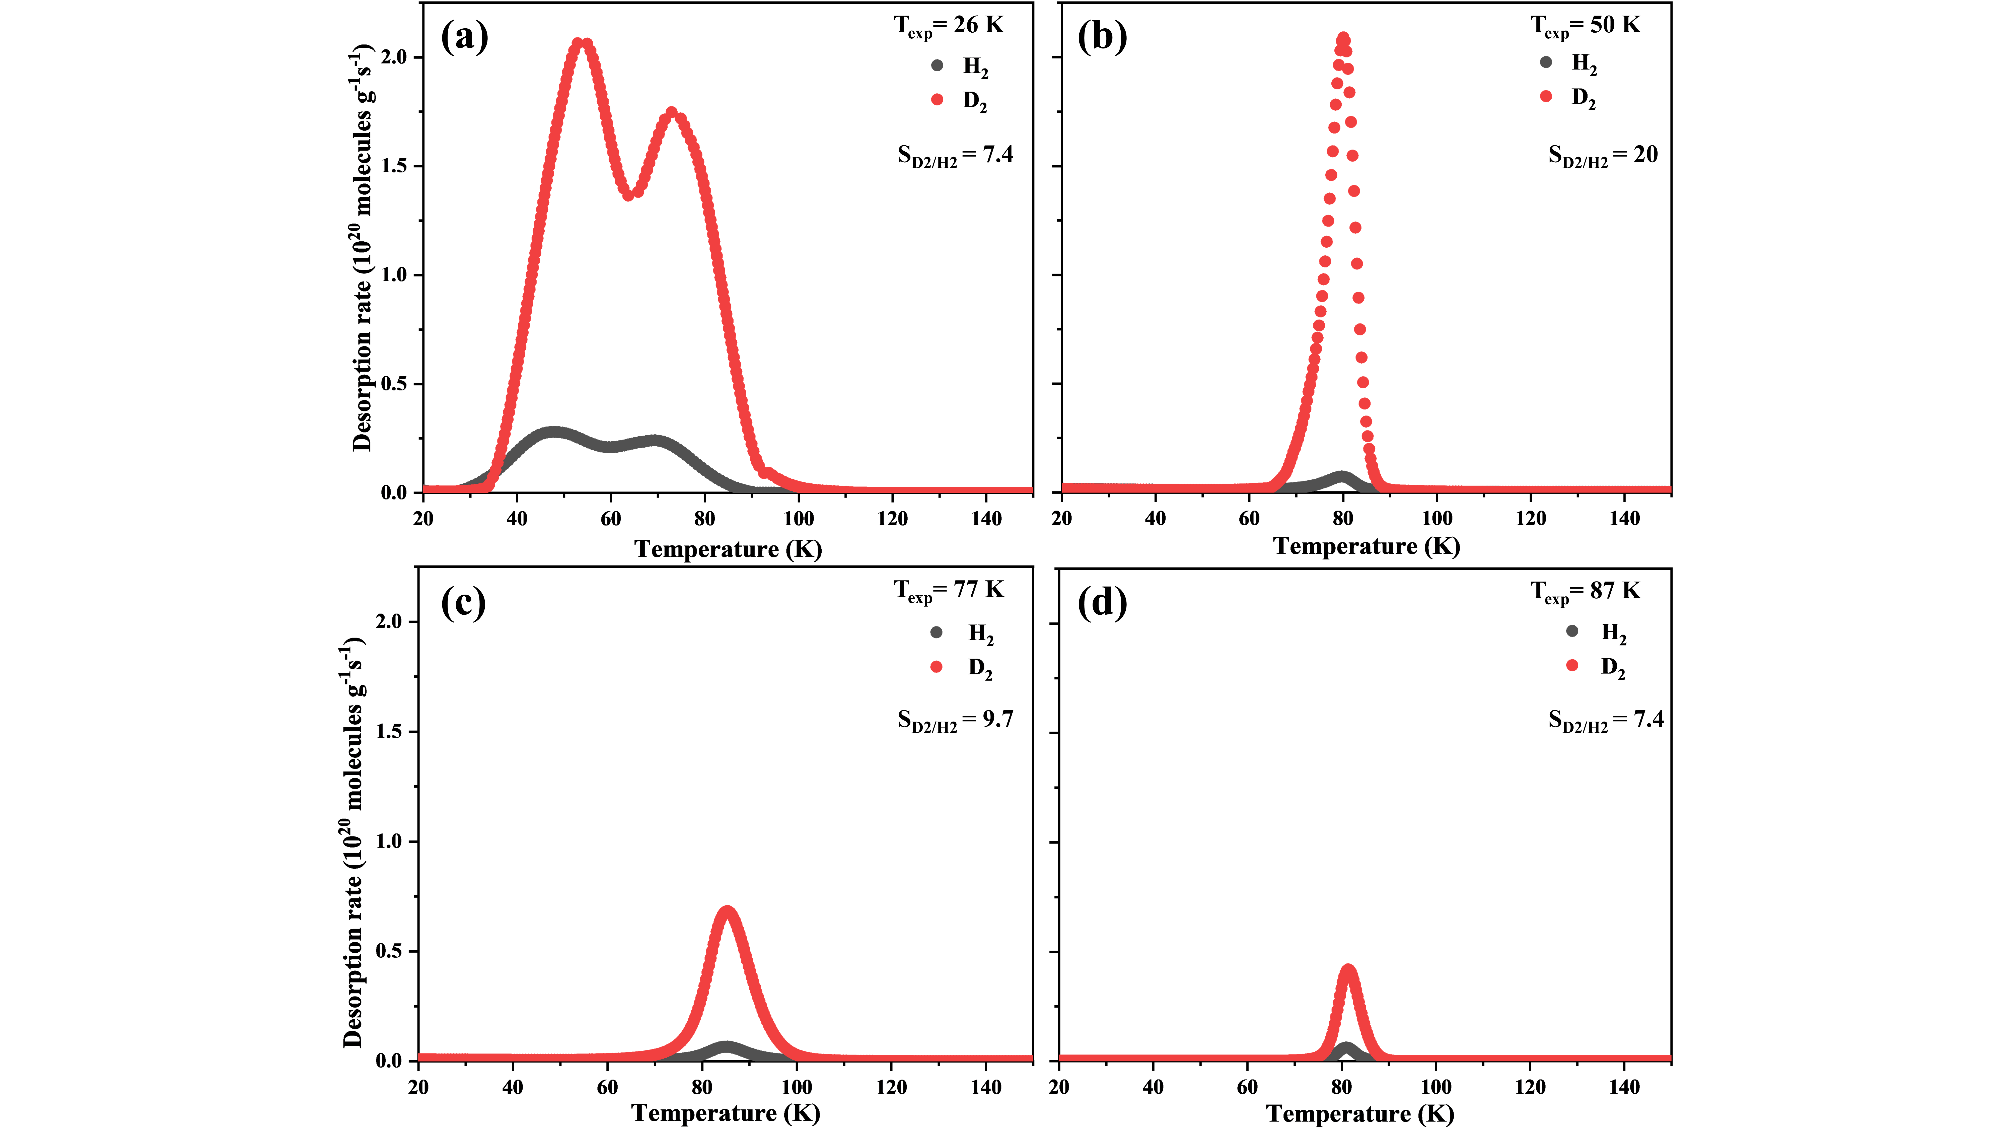
**

**Figure S10.** H2 (black) and D2 (red) desorption spectra of 10 mbar (1:1 D2/H2 mixture) loading on Cu-ATC with a heating rate of 0.1 K/s. Exposure temperature (Texp) at (a) 26 K, (b) 50 K, (c) 77 K and (d) 87 K.

**
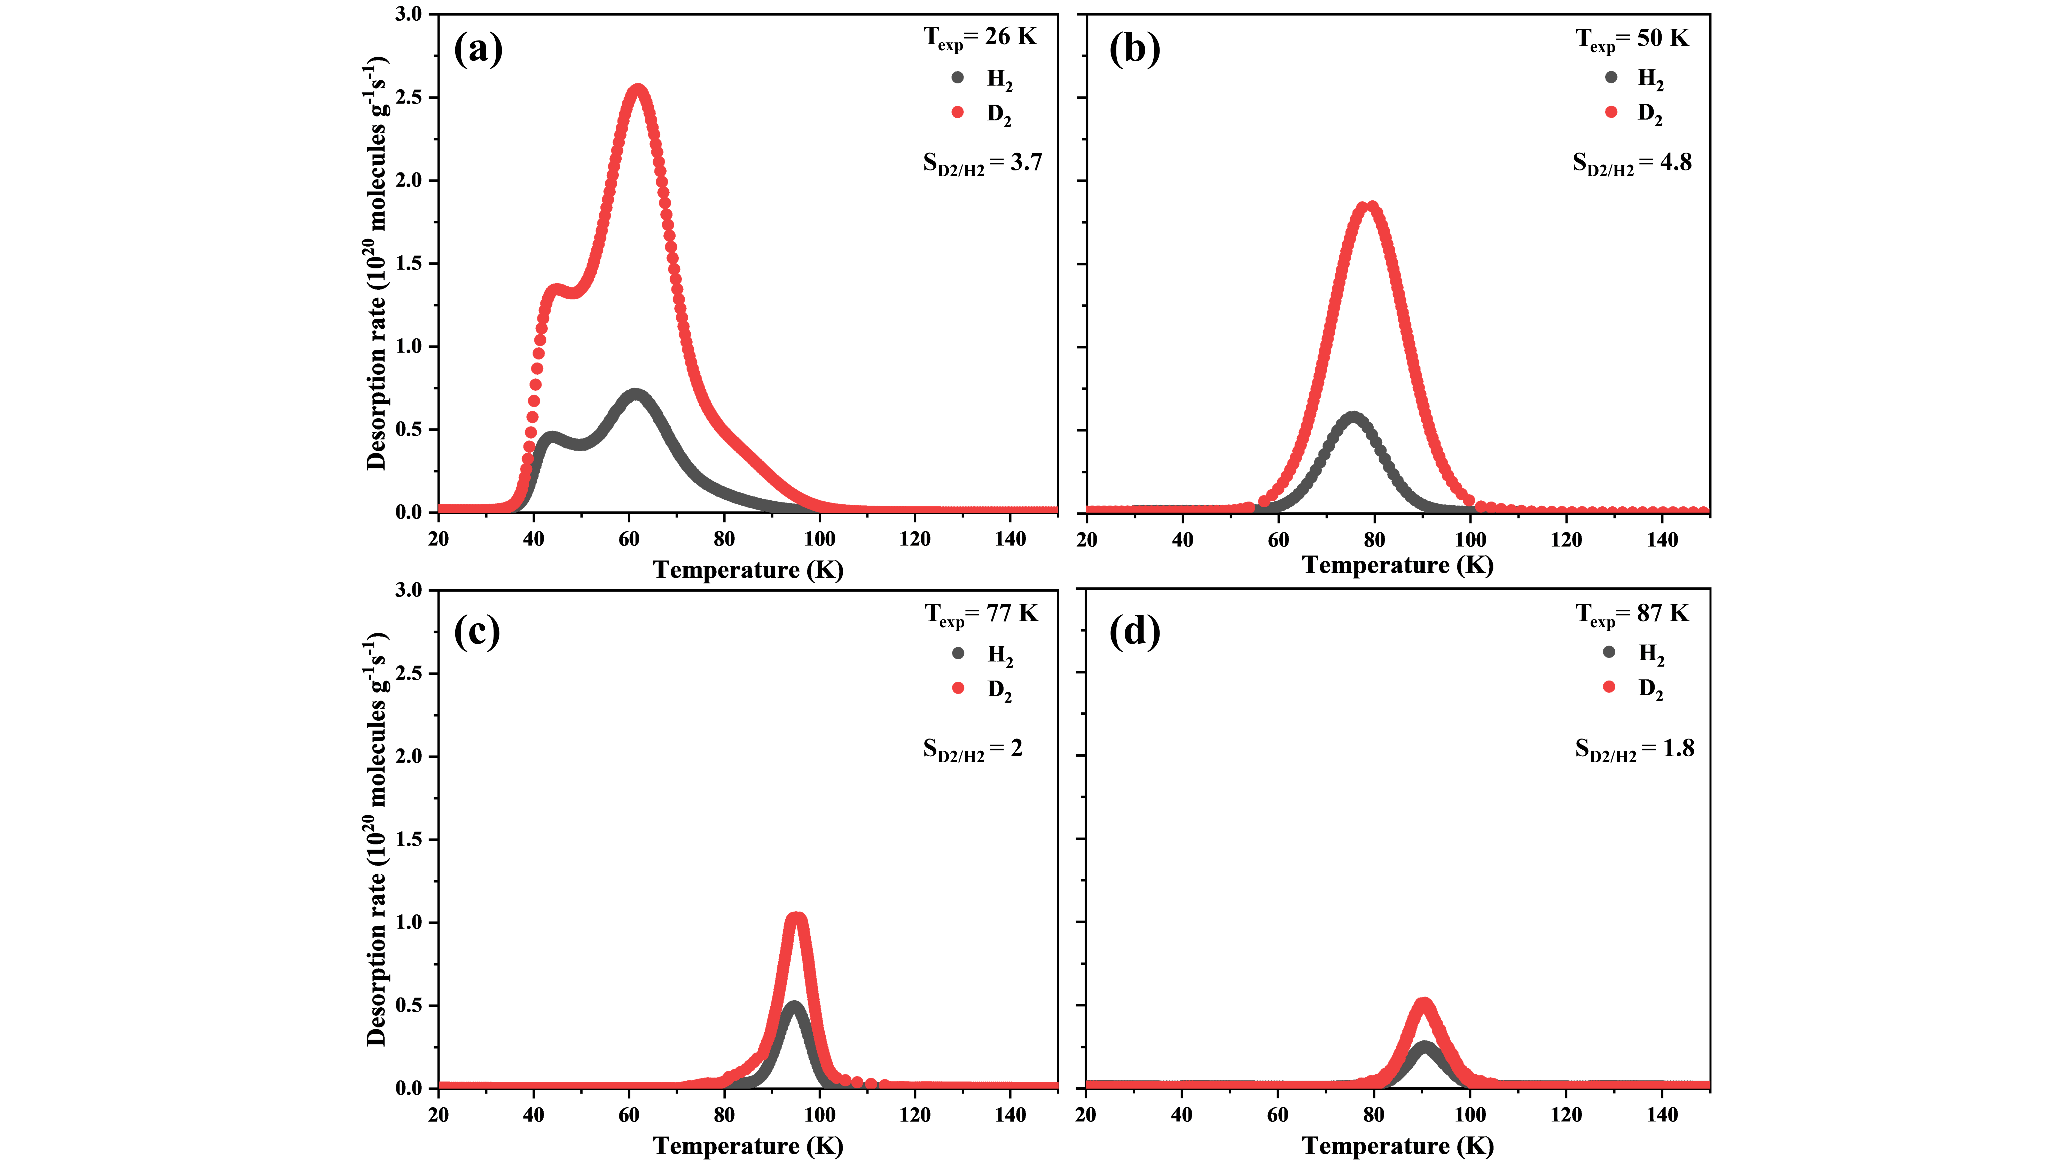
**

**Figure S11.** H2 (black) and D2 (red) desorption spectra of 10 mbar (1:1 D2/H2 mixture) loading on Cu-bptc with a heating rate of 0.1 K/s. Exposure temperature (Texp) at (a) 26 K, (b) 50 K, (c) 77 K and (d) 87 K.

**
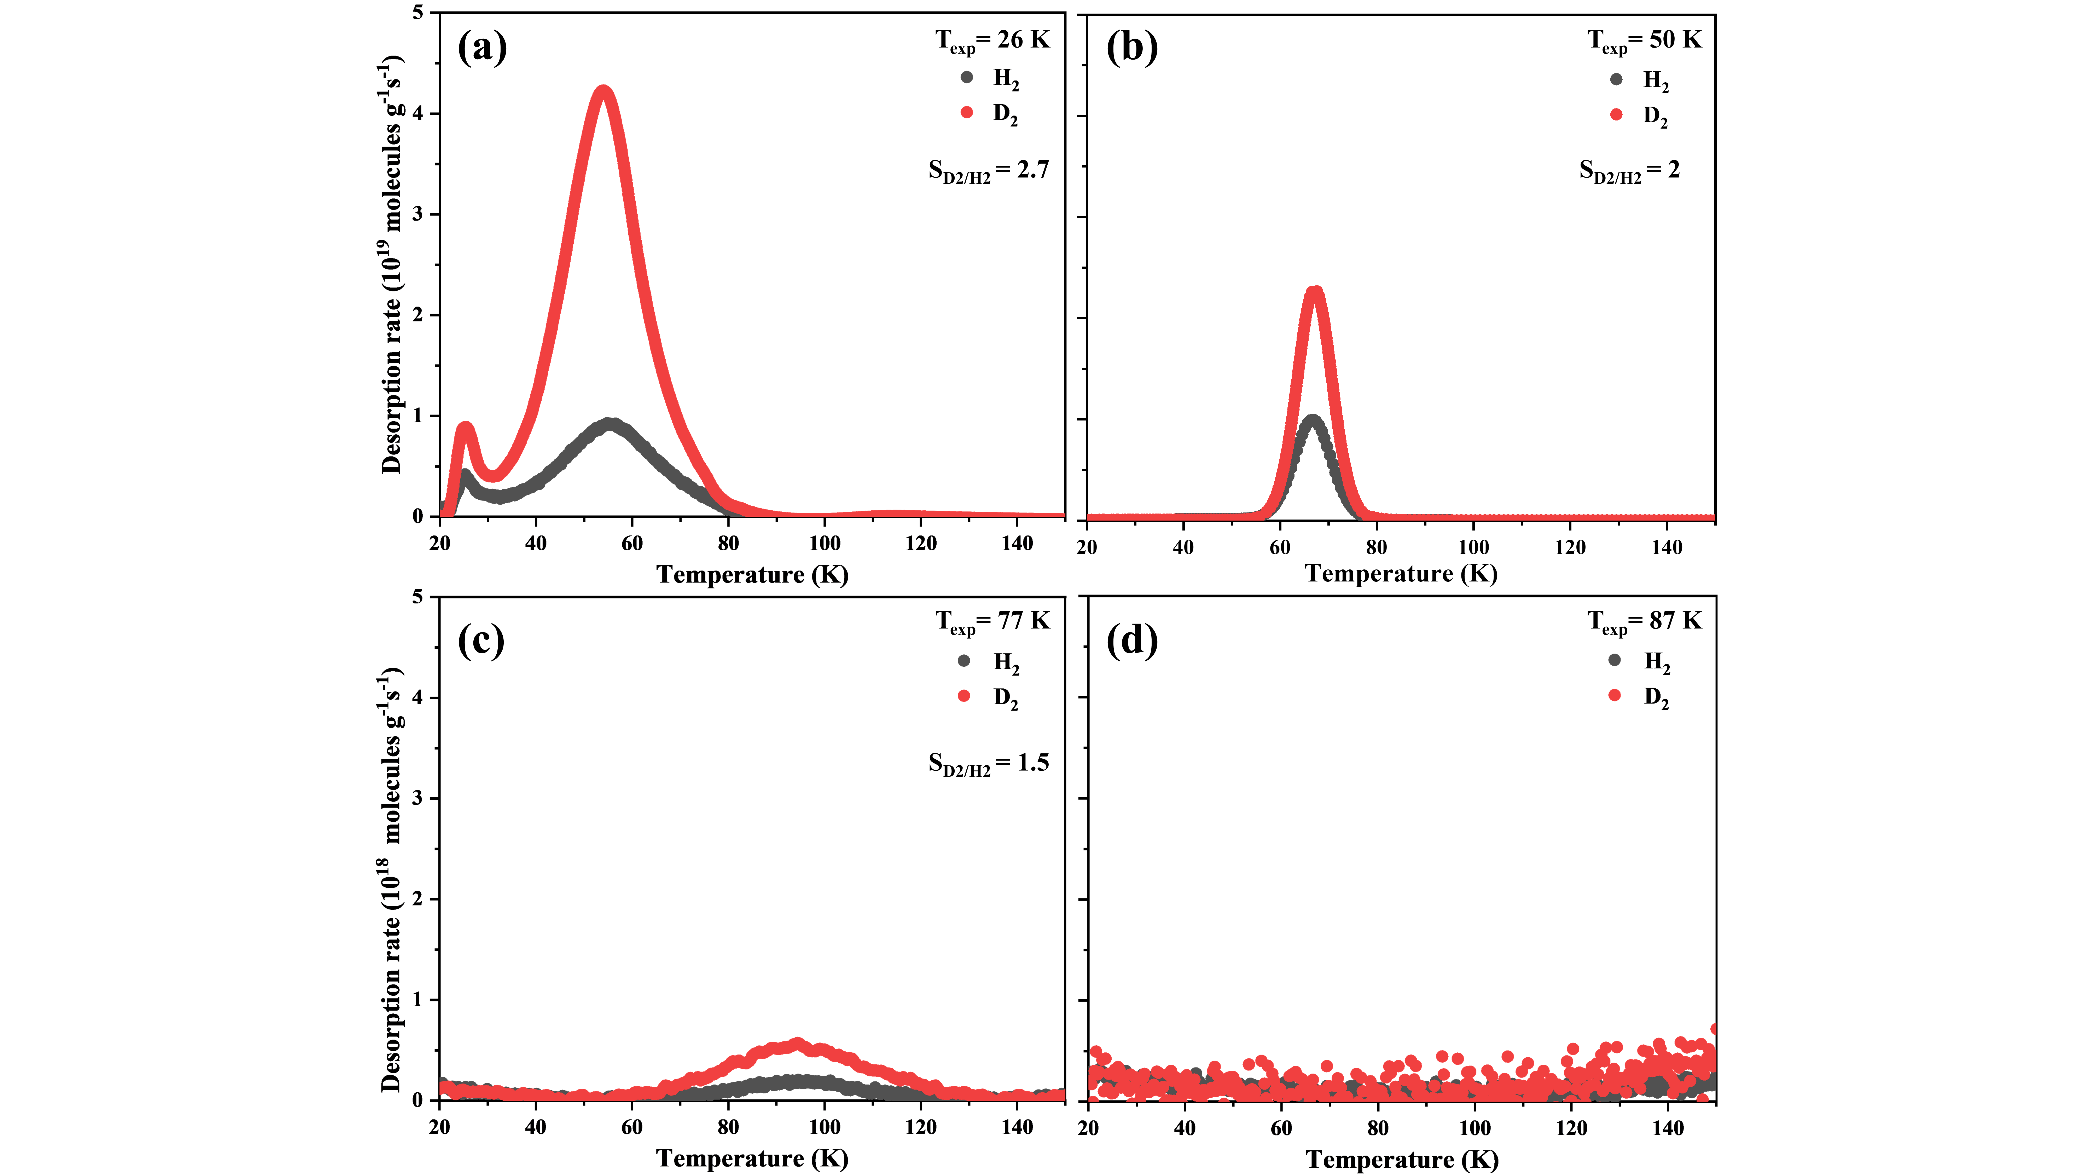
**

**Figure S12.** H2 (black) and D2 (red) desorption spectra of 10 mbar (1:1 D2/H2 mixture) loading on Cu-mbtc with a heating rate of 0.1 K/s. Exposure temperature (Texp) at (a) 26 K, (b) 50 K, (c) 77 K and (d) 87 K.


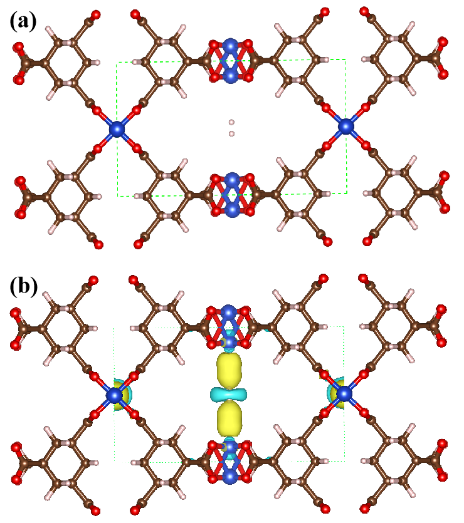


**Figure S13.** (a) Crystal structure of the Cu-ATC-D2; (b) Charge density difference image of the Cu-ATC-D2.

| **Compound** | **method** | **T(K)** | **P(mbar)** | **SD2/H2(1:1 mixture)** | **Ref.** |
| --- | --- | --- | --- | --- | --- |
| Cu-ATC | TDS | 26/50/77/87 | 10 | 7.4/20/9.7/7.4 | This work |
| Cu-bptc | TDS | 26/50/77/87 | 10 | 3.7/4.8/2/1.8 | This work |
| Cu-mbtc | TDS | 26/50/77 | 10 | 2.7/2/1.5 | This work |
| Co(pyz)[Ni(CN)4] | TDS | 25/40/60 | 10 | 17.77/3.97/2.53 | 16 |
| Co(pyz)[Pd(CN)4] | TDS | 25/40/60 | 10 | 21.71/4.87/2.3 | 16 |
| Co(pyz)[Pt(CN)4] | TDS | 25/40/60 | 10 | 16.08/4.06/2.34 | 16 |
| MOF-74-ac | TDS | 20/40/60/77 | 10 | 7.1/11.4/16.1/19.1 | 17 |
| MOF-74-IM-10 | TDS | 20/40/60/77 | 10 | 5.7/9.2/19.6/25.8 | 17 |
| MOF-74-IM-38 | TDS | 20/40/60/77 | 10 | 8.5/12.2/11.3/5.2 | 17 |
| Cu(I)-MFU-4l | TDS | 90/100 | 10 | 7.1/11.1 | 18 |
| CPO-27-Co | TDS | 20/30/40/50/60/77 | 60 | 4.4/4.8/5.5/6/12.5/8.4/6.3 | 19 |
| Ni2Cl2BBTA | TDS | 77/87 | 10 | 4.5/4 | 20 |
| Cu(I)Cu(II)-BTC | TDS | 25/30/40/50/60 | 10 | 34.4/37.9/7.4/2.9/1 | 21 |
| Cu(II)-BTC | TDS | 25/30/40/50/60 | 10 | 4.3/5.2/1.5/3 | 21 |
| Ag(I)-ZSM-5 | TDS | 40/60/70 | 10 | 2.4/3.5/9.1 | 22 |
| Cu(I)-ZSM-5 | TDS | 60/100 | 10 | 2.8/24.9 | 23 |

**Table S1.** Summary of hydrogen isotope separation factors for various MOFs as a function of working temperature

**Reference:**

1 Chen, B. *et al.* Cu2(ATC)·6H2O:  Design of Open Metal Sites in Porous Metal−Organic Crystals (ATC:  1,3,5,7-Adamantane Tetracarboxylate). *Journal of the American Chemical Society* **122**, 11559-11560, doi:10.1021/ja003159k (2000).

2 Chen, B., Ockwig, N. W., Millward, A. R., Contreras, D. S. & Yaghi, O. M. High H2 Adsorption in a Microporous Metal–Organic Framework with Open Metal Sites. *Angewandte Chemie International Edition* **44**, 4745-4749, doi:<https://doi.org/10.1002/anie.200462787> (2005).

3 Ma, L., Jin, A., Xie, Z. & Lin, W. Freeze Drying Significantly Increases Permanent Porosity and Hydrogen Uptake in 4,4-Connected Metal–Organic Frameworks. *Angewandte Chemie International Edition* **48**, 9905-9908, doi:<https://doi.org/10.1002/anie.200904983> (2009).

4 Myers, A. L. & Prausnitz, J. M. Thermodynamics of mixed-gas adsorption. *AIChE Journal* **11**, 121-127, doi:<https://doi.org/10.1002/aic.690110125> (1965).

5 Lin, R.-B. *et al.* Molecular sieving of ethylene from ethane using a rigid metal–organic framework. *Nature Materials* **17**, 1128-1133, doi:10.1038/s41563-018-0206-2 (2018).

6 Wu, Y. *et al.* Enhancement effect of lithium-doping functionalization on methanol adsorption in copper-based metal-organic framework. *Chemical Engineering Science* **123**, 1-10, doi:<https://doi.org/10.1016/j.ces.2014.10.010> (2015).

7 Zhang, Q., Cao, L., Li, B. & Chen, L. Catalyzed activation of CO2 by a Lewis-base site in W–Cu–BTC hybrid metal organic frameworks. *Chemical Science* **3**, 2708-2715, doi:10.1039/C2SC20521A (2012).

8 Zhou, C., Cao, L., Wei, S., Zhang, Q. & Chen, L. A first principles study of gas adsorption on charged CuBTC. *Computational and Theoretical Chemistry* **976**, 153-160, doi:<https://doi.org/10.1016/j.comptc.2011.08.018> (2011).

9 Kresse, G. & Furthmüller, J. Efficient iterative schemes for ab initio total-energy calculations using a plane-wave basis set. *Physical Review B* **54**, 11169-11186, doi:10.1103/PhysRevB.54.11169 (1996).

10 Kresse, G. & Hafner, J. Ab initio molecular dynamics for open-shell transition metals. *Physical Review B* **48**, 13115-13118, doi:10.1103/PhysRevB.48.13115 (1993).

11 Kresse, G. & Hafner, J. Ab initio molecular dynamics for liquid metals. *Physical Review B* **47**, 558-561, doi:10.1103/PhysRevB.47.558 (1993).

12 Kresse, G. & Hafner, J. Ab initio molecular-dynamics simulation of the liquid-metal--amorphous-semiconductor transition in germanium. *Physical Review B* **49**, 14251-14269, doi:10.1103/PhysRevB.49.14251 (1994).

13 Perdew, J. P., Burke, K. & Ernzerhof, M. Generalized Gradient Approximation Made Simple. *Physical Review Letters* **77**, 3865-3868, doi:10.1103/PhysRevLett.77.3865 (1996).

14 Blöchl, P. E. Projector augmented-wave method. *Physical Review B* **50**, 17953-17979, doi:10.1103/PhysRevB.50.17953 (1994).

15 Wang, V., Xu, N., Liu, J.-C., Tang, G. & Geng, W.-T. VASPKIT: A user-friendly interface facilitating high-throughput computing and analysis using VASP code. *Computer Physics Communications* **267**, 108033, doi:<https://doi.org/10.1016/j.cpc.2021.108033> (2021).

16 Ha, J., Jung, M., Park, J., Oh, H. & Moon, H. R. Thermodynamic Separation of Hydrogen Isotopes Using Hofmann-Type Metal–Organic Frameworks with High-Density Open Metal Sites. *ACS Applied Materials & Interfaces* **14**, 30946-30951, doi:10.1021/acsami.2c07829 (2022).

17 Kim, J. Y. *et al.* Exploiting Diffusion Barrier and Chemical Affinity of Metal–Organic Frameworks for Efficient Hydrogen Isotope Separation. *Journal of the American Chemical Society* **139**, 15135-15141, doi:10.1021/jacs.7b07925 (2017).

18 Weinrauch, I. *et al.* Capture of heavy hydrogen isotopes in a metal-organic framework with active Cu(I) sites. *Nature Communications* **8**, 14496, doi:10.1038/ncomms14496 (2017).

19 Oh, H., Savchenko, I., Mavrandonakis, A., Heine, T. & Hirscher, M. Highly Effective Hydrogen Isotope Separation in Nanoporous Metal–Organic Frameworks with Open Metal Sites: Direct Measurement and Theoretical Analysis. *ACS Nano* **8**, 761-770, doi:10.1021/nn405420t (2014).

20 Li, X. *et al.* Highly selective adsorption of D2 from hydrogen isotopes mixture in a robust metal bistriazolate framework with open metal sites. *International Journal of Hydrogen Energy* **45**, 21547-21554, doi:<https://doi.org/10.1016/j.ijhydene.2020.05.096> (2020).

21 Hu, X. *et al.* Highly Effective H2/D2 Separation within the Stable Cu(I)Cu(II)-BTC: The Effect of Cu(I) Structure on Quantum Sieving. *ACS Applied Materials & Interfaces* **15**, 3941-3952, doi:10.1021/acsami.2c18221 (2023).

22 Xiong, R. *et al.* Hydrogen isotopes separation in Ag(I) exchanged ZSM-5 zeolite through strong chemical affinity quantum sieving. *Microporous and Mesoporous Materials* **313**, 110820, doi:<https://doi.org/10.1016/j.micromeso.2020.110820> (2021).

23 Xiong, R. *et al.* Highly effective hydrogen isotope separation through dihydrogen bond on Cu(I)-exchanged zeolites well above liquid nitrogen temperature. *Chemical Engineering Journal* **391**, 123485, doi:<https://doi.org/10.1016/j.cej.2019.123485> (2020).
